# Dysregulation of circulating protease activity in Covid-19-associated superinfection

Fernando Dos Santos<sup>1</sup>, Joyce B. Li<sup>2</sup>, Nathalia Juocys<sup>1,3</sup>, Rafi Mazor<sup>1</sup>, Laura Beretta<sup>4</sup>,  
Nicole G. Coufal<sup>5</sup>, Michael T.Y. Lam<sup>6</sup>, Mazen F. Odish<sup>6</sup>, Maria C. Irigoyen<sup>3</sup>,  
Anthony J. O'Donoghue<sup>4</sup>, Federico Aletti<sup>7\*</sup>, Erik B. Kistler<sup>1,8\*</sup>

1

2 <sup>1</sup>Department of Anesthesiology, School of Medicine, University of California, San Diego, La Jolla, CA,  
3 U.S.A.

4 <sup>2</sup>Department of Bioengineering, University of California, San Diego, La Jolla, CA, U.S.A.

5 <sup>3</sup>Instituto do Coração, Hospital das Clínicas, Faculdade de Medicina, Universidade de São Paulo  
6 (InCor-FMUSP), São Paulo, Brazil

7 <sup>4</sup>Skaggs School of Pharmacy and Pharmaceutical Sciences, University of California, San Diego, La  
8 Jolla, CA, U.S.A.

9 <sup>5</sup>Department of Pediatrics, School of Medicine, University of California, San Diego, La Jolla, CA,  
10 U.S.A.

11 <sup>6</sup>Department of Medicine, School of Medicine, University of California, San Diego, La Jolla, CA, U.S.A.

12 <sup>7</sup>Instituto de Ciência e Tecnologia, Universidade Federal de São Paulo, São José dos Campos, Brazil

13 <sup>8</sup>Department of Anesthesiology & Critical Care, VA San Diego Healthcare System, San Diego, CA,  
14 U.S.A.

15

16 **\* Correspondence:**

17 Federico Aletti – faletti@unifesp.br

18 Erik Kistler – ekistler@health.ucsd.edu

19

20 Keywords: Covid-19, Sepsis, Proteolysis, Enzymatic activity, Peptidomics, Proteomics

21

## 22 **Abstract**

23 Infection by SARS-CoV-2 and subsequent COVID-19 can cause viral sepsis and septic  
24 shock. Several complications have been observed in patients admitted to the intensive care  
25 unit (ICU) with COVID-19, one of those being bacterial superinfection. Based on prior  
26 evidence that dysregulated systemwide proteolysis is associated with death in bacterial septic  
27 shock, we investigated whether protease activity and proteolysis could be elevated in COVID-  
28 19-induced sepsis with bacterial superinfection. In particular, we sought to assess the  
29 possible implications on the regulation of protein systems, such as for instance the proteins  
30 and enzymes involved in the clotting cascade.

31 Blood samples collected at multiple time points during the ICU stay of four COVID-19 patients  
32 were analyzed to quantify: a) the circulating proteome and peptidome by mass spectrometry;  
33 b) plasma enzymatic activity of trypsin-like substrates and five clotting factors (plasmin,  
34 thrombin, factor VII, factor IX, factor X) by a fluorogenic assay.

35 Of the four patients, one was diagnosed with bacterial superinfection on day 7 after beginning  
36 of the study and later died. The other three patients all survived (ICU length-of-stay  
37  $11.25 \pm 6.55$  days, hospital stay of  $15.25 \pm 7.18$  days). Spikes in protease activity (factor VII,  
38 trypsin-like activity) were detected on day 7 for the patient who died. Corresponding increases  
39 in the total intensity of peptides derived by hydrolysis of plasma proteins, especially of  
40 fibrinogen degradation products, and a general reduction of coagulation proteins, were  
41 measured as well. A downregulation of endogenous enzymatic inhibitors, in particular trypsin  
42 inhibitors, characterized the non-surviving patient throughout her ICU stay. Enzymatic activity  
43 was stable in the patients who survived.

44 Our study highlights the potential of multiomics approaches, combined with quantitative  
45 analysis of enzymatic activity, to i) shed light on proteolysis as a possible pathological  
46 mechanism in sepsis and septic shock, including COVID-19-induced sepsis; ii) provide

47 additional insight into malfunctioning protease-mediated systems, such as the coagulation  
48 cascade; and iii) describe the progression of COVID-19 with bacterial superinfection.

49

## 50 **1. Introduction**

51 The Coronavirus disease (COVID-19) pandemic is caused by viral infection with the  
52 coronavirus SARS-CoV-2. Affecting every organ of the body following initial infection of the  
53 respiratory system, this highly contagious virus has contributed to the deaths of almost 5  
54 million people to date. Despite the emphasis on COVID-19 research, our understanding of  
55 the disease remains incomplete and therapeutic options are limited (1-7). Frequent and fatal  
56 complications arising from SARS-CoV-2-induced sepsis include cytokine storm and  
57 coagulopathies (8,9). Less frequent (10), but not less dangerous, bacterial superinfections  
58 make the clinical treatment of COVID-19 patients in the intensive care unit (ICU) even more  
59 challenging, especially because of the lack of sound hypotheses as to the underlying  
60 pathology and interplay between viral and bacterial infection and their clinical implications  
61 (11).

62 We have previously shown, in both animal and human studies, that a possible pathological  
63 mechanism triggered by acute illness, including bacterial sepsis and septic shock, is  
64 dysregulated proteolysis (12-15). Major protease-mediated systems are known to be affected  
65 in critical illness, including activation of the coagulation and complement cascades. To better  
66 understand the possible relationship between systemic proteolysis occurring in shock,  
67 including COVID-19-induced septic shock and the malfunction of these protease-mediated  
68 systems, we have developed a complex, multimodal approach to assess protease activity  
69 and proteolysis in plasma, consisting of quantitative enzymatic activity assays and mass  
70 spectrometry-based multi-omics analyses of the circulating proteome and peptidome. The  
71 utilization of these techniques has shown promising results in the ability to i) estimate in vivo  
72 proteolysis in plasma as a marker of ongoing systemic proteolysis during shock (13,14) and  
73 ii) detect circulating peptidase activity (16).

74 The hypothesis of this study was that a complex, dynamic description of plasma proteins and  
75 the activity of some of their most important circulating enzymatic substrates can be leveraged  
76 as a tool to shed light on the progression of COVID-19 and the risk for fatal complications,  
77 especially in the presence of bacterial superinfection and diagnosis of sepsis and septic  
78 shock. The specific goals that we aimed to investigate were to assess: 1) the patterns of  
79 protease activity in the plasma of COVID-19 patients following admission to the ICU by means  
80 of quantitative analysis of enzymatic activity; 2) the relationship between alterations in  
81 protease activity over time during ICU stay and the development of bacterial superinfection;  
82 3) the possible implications of dysregulated proteolysis on major protein systems (e.g.,  
83 clotting proteins and enzymes) by analysis of plasma proteomics and peptidomics.

84

85

## 86 **2. Materials and Methods**

### 87 **2.1 Clinical measurements**

88 This was a prospective observational study. The University of California, San Diego  
89 Institutional Review Board (IRB) provided approval of the study conduct (IRB# 190699,  
90 Protocol #20-0006); informed consent was obtained for the collection of blood samples and  
91 de-identified use of the data. A convenience sample of four adult critically ill patients with  
92 confirmed positive test for COVID-19 by real-time reverse transcription polymerase chain  
93 reaction (RT-PCR) admitted to the Intensive Care Units (ICUs) at the University of California,  
94 San Diego Medical Center between April 01, 2020, and May 30, 2020, was enrolled in the  
95 study. De-identified demographic and prior health history data were obtained. Three healthy  
96 subjects were enrolled as a control group for enzymatic activity assays.

97 Standard laboratory measurements were obtained as necessary for optimal patient care by  
98 the UC San Diego Medical Center for Advanced Laboratory Medicine (CALM) laboratories as  
99 part of regular and usual care. No additional laboratory data were collected.

100 All non-standard laboratory assays, including protease activity assays and mass  
101 spectrometry measurements were conducted off-site in academic research laboratories at  
102 the University of California, San Diego. Patient blood samples (3-10mL) were collected in  
103 sodium heparin (BD Vacutainer, REF: 366480) tubes. To prevent coagulation, the tubes were  
104 inverted 10 times prior to transport at room temperature. Blood was processed within 4 hours  
105 of collection and kept at room temperature throughout the protocol. Polymorphprep™ was  
106 added to collected samples and centrifuged at 500g x 30 mins to separate plasma from white  
107 blood cells per manufacturer's instructions (Progen) and transferred to new Eppendorf tubes  
108 and centrifuged at 3731 x g for 5 minutes to remove any cellular debris. The supernatant was  
109 transferred to new tubes and flash frozen in dry ice and 95% ethanol. Plasma was aliquoted  
110 and stored at -80° C for further analysis.

111 The clinical data acquisition and blood sample collection started on the day following protocol  
112 study consent (usually day of ICU admission) and was repeated on the following day and  
113 every other day thereafter until patient discharge or death.

114

## 115 **2.2 Enzymatic activity**

116 To test the enzymatic activity in COVID-19 plasma samples, we selected a variety of  
117 fluorogenic substrates, with a specific focus on enzymes with trypsin-like activity and clotting  
118 factors. All plasma samples were processed and analyzed simultaneously for each substrate,  
119 including healthy control plasma. The peptide sequences used in this assay were chosen as

120 substrates for coagulation factor enzymes, tryptic enzymes in general, as well as  
121 endopeptidase activity (**Supplementary File 1**). Briefly, a 384-well plate was used to combine  
122 15 $\mu$ L of plasma (1/50 final dilution in PBS, pH=7.4) with 15 $\mu$ L of each substrate (5 $\mu$ M in PBS)  
123 in triplicate wells and immediately measured for activity with a spectrophotometer (FilterMax  
124 F5 Multi-Mode, Molecular Devices) with excitation of 360 nm and emission of 460 nm. Wells  
125 were read every 2 minutes and 45 seconds for 4 hours and 50 minutes thereby generating  
126 fluorescent activity progress curves that each contain 100 data points. Fluorogenic activity  
127 was reported as relative fluorescence units per second using the slope from the progress  
128 curve where the  $r^2$  value was higher than 0.98. The activity was corrected by the dilution  
129 factor. Due to the large variance measured between patients, all results shown are plotted as  
130 the percentage of enzymatic activity relative to average of healthy control plasma samples on  
131 a  $\log_2$  scale.

132

### 133 **2.3 Proteomics and Peptidomics Analysis of COVID-19 Plasma**

134 All plasma samples from the COVID-19 patients were subjected to a series of protein  
135 extraction and pretreatment steps prior to mass spectrometry. The complete protocols for  
136 plasma sample preparation, processing and data analysis steps can be found in  
137 **Supplementary File 1**. Briefly, for proteomics measurements, proteins were precipitated  
138 from the plasma samples, treated with denaturing, reducing, and alkylating reagents, and  
139 enzymatically digested with trypsin. To quantify peptides in plasma, high molecular weight  
140 proteins were first removed following addition of methanol and the remaining peptide  
141 quantified by LC-MS/MS. PEAKS Studio 8.5 (Bioinformatics Solutions, Inc.) proteomics  
142 software was used for protein identification and quantification.

143 For the purposes of our study, the analysis of the circulating proteome and peptidome focused  
144 on three main groups of proteins, according to their function: 1) coagulation; 2) complement  
145 system, immune response and inflammation; and 3) endogenous protease inhibitors. Each  
146 of these systems is known to be affected by acute illness, and their clinical management  
147 poses significant challenges in critically ill patients. The proteins most relevant to our analyses  
148 included: a) coagulation factors and fibrinogen for coagulation analysis; b) complement  
149 factors, vascular endothelial growth factor receptor 2 (VEGF2) and C-reactive protein for  
150 immune response and inflammation; c) serpins such as trypsin and chymotrypsin inhibitors,  
151 thrombin and plasmin inhibitors, C1 inhibitors and heparin cofactor II for endogenous enzyme  
152 inhibitors.

153 For proteome analysis, we used the  $\log_2$  ratio of each individual intensity measurement to the  
154 average of all sample intensities for each protein. Heat maps for the three main protein  
155 function groups considered for analysis were generated and analyzed using the web-based  
156 visualization software Morpheus (<https://software.broadinstitute.org/morpheus>). Identified  
157 proteins were hierarchically clustered with the one minus Pearson's correlation metric and  
158 average linkage method for each protein group. Columns were sorted by patient and ordered  
159 by day of sample collection.

160 For peptidomic analysis, the degree of overall proteolysis was estimated by the sum of all  
161 fragment intensities in a sample. Similarly, the proteolysis of a single protein was estimated  
162 by the sum of the intensities of the peptides generated by that protein. An online web tool,  
163 Peptigram (@Bioware - © University College Dublin) (17) was used to build cleavage maps  
164 representative of the number of peptides generated by a parent protein, abundance and  
165 length of each amino acid sequence, and cleavage site on the parent protein of origin.

166



### 167 **3. Results**

168 Patient characteristics are described in **Table 1**. The four patients randomly selected for  
169 analysis were comprised of three males and one female and ranged in age from 29-88 years.  
170 Reflecting the overall demographics of the COVID-19 epidemic in San Diego, three of the  
171 subjects were Hispanic. One patient, who will be referred to as “Patient 3” in the following,  
172 was diagnosed with bacterial superinfection and subsequent sepsis on day 7 and died on day  
173 16 of her ICU stay. The remainder (Patients 1, 2 and 4) were discharged from the ICU with a  
174 mean ICU length-of-stay for all subjects of  $11.25\pm 6.55$  days and mean hospital stay of  
175  $15.25\pm 7.18$  days. Body mass index (BMI) was  $28.84\pm 3.65$  kg/m<sup>2</sup> (range: 29.4-32.14 kg/m<sup>2</sup>)  
176 and self-described baseline health was either “fit” or “well”.

177 All patients were initially treated with azithromycin. The three surviving subjects, who did not  
178 present with a bacterial superinfection, were also treated with ceftriaxone. Patient 3 was  
179 treated after positive culture identification (*Pseudomonas aeruginosa* in urine and  
180 *Enterobacter aerogenes* pneumonia) with piperacillin/tazobactam and later, with meropenem  
181 and vancomycin, after clinical failure to respond to infection. The three more critically ill  
182 patients’ pulmonary function reflected a diagnosis of Acute Respiratory Distress Syndrome  
183 (ARDS) and these patients were intubated and placed on mechanical ventilation for at least  
184 some period of their ICU stay. These three patients also required the application of  
185 vasopressor agents to maintain hemodynamic stability.

186 Pertinent laboratory data are reported in **Table 2** and reflect a relatively homogeneous  
187 distribution of their hemogram as well as metabolic laboratory results (not shown) and  
188 coagulation panel. It should be noted that the outlying results in Patient 3’s white blood count  
189 (WBC) of  $19.8\times 10^9/L$ , hemoglobin of 6.4 g/dL, and platelet count of  $461\times 10^3\ \mu L/ml$  are from  
190 the final day of the patient’s hospital stay and represent her moribund condition.

191 Enzymatic activity data are reported in **Figure 1** (coagulation enzymes) and in **Figure 2**  
192 (trypsin-like enzymes and exopeptidases). **Figure 1** shows that plasmin activity remained  
193 stable over time and between patients, serving as internal control of enzymatic activity.  
194 Thrombin and Factor IX activity showed an increasing trend over the first five days of ICU  
195 admission followed by decrease. Factor X activity decreased over time in Patients 1 and 2  
196 compared to day 2 and increased in Patients 3 and 4. The main finding was the marked  
197 increase in Factor VII activity and tryptic-like activity, particularly at a terminal Val-Arg (**Figure**  
198 **2**) in Patient 3 on day 7, when bacterial superinfection was diagnosed.

199 **Figure 2** also shows static amino- peptidase activity (Met-AP (Vivitide®, Gardner, MA)),  
200 serving as a de facto negative control for the assay.

201

202 **Figure 1.**  
203 Clotting enzyme activity during the ICU stay of the four patients enrolled in the study.

204

205 **Figure 2.**  
206 Trypsin-like and amino-peptidase activity during the ICU stay of the four patients enrolled in  
207 the study.

208

209 Patient 3 exhibited a reduction in several plasma coagulation proteins such as coagulation  
210 factors V and XI on day 7 and thereafter, and a concomitant increase in the expression of  
211 fibrinogen, plasma kallikrein and von Willebrand factor (**Figure 3A**). Overall, there were mild  
212 changes over time in plasma from Patient 3 in the abundance of proteins involved in the  
213 immune and inflammatory response (**Figure 3B**), as shown by diverging trends of increase  
214 and decrease of the complement factors. Interestingly, starting on day 7 ficolin-1 and VEGF  
215 2 were increased in Patient 3, while the trend was less apparent and characterized by some  
216 variability in the other patients. C-reactive protein showed a progressively decreasing trend

217 in expression over time in all four patients. A general trend towards a reduction in the  
218 expression of enzymatic inhibitors, in particular of endogenous trypsin inhibitors, was  
219 observed in Patient 3, (**Figure 3C**). Thrombin inhibitors such as antithrombin-III and heparin  
220 cofactor II were also characterized by lower abundance in Patient 3 compared to the survivors  
221 at all time points.

222 The proteins characterized by the most evident trends (over time and between patients) are  
223 highlighted in the heat maps in Figure 3 with a diamond sign next to the protein name. For  
224 the complete proteome profile, please see **Supplementary File 2**.

225

### 226 **Figure 3.**

227 Heatmaps of the most significant proteins involved in coagulation (A), immune or  
228 inflammatory response (B), and endogenous enzymatic inhibition (C) detected in COVID-19  
229 patient plasma. Data are presented as Log<sub>2</sub> ratio of the averages. Rows of identified proteins  
230 were hierarchically clustered with the one minus Pearson's correlation metric and average  
231 linkage method for each protein group. Columns were sorted by patient and ordered by day  
232 of sample collection. The heatmaps were obtained using the visualization software Morpheus  
233 (<https://software.broadinstitute.org/morpheus/>).

234

235 The sum of the intensities of all the peptide fragments detected at each time point from a total  
236 of 233 source proteins suggests marked proteolytic activity in Patient 3 on day 7 (**Figure 4A**).

237 This ongoing protein degradation was particularly evident in fibrinogen- $\alpha$  and fibrinogen- $\beta$   
238 (**Figure 4B and 4C**). Of note, peptides derived from  $\alpha$ 2-antiplasmin had a characteristic trend

239 in Patients 1, 3 and 4, with a progressive increase until day 5, followed by an abrupt reduction  
240 and a progressive increase thereafter. **Figure 4E** shows the unique patterns of protein

241 cleavage for fibrinogen- $\alpha$  obtained by Peptigram analysis and the size and location of the  
242 fragments that suggest that the enhanced proteolytic activity seen on day 7 in Patient 3

243 increases the amount of circulating fibrinopeptide A (FPA). The link to the complete  
244 peptidome profile on Peptigram can be found in **Supplementary File 1**.

245

246

#### **Figure 4.**

247 Total intensity as the sum of the intensities of the peptides detected in COVID-19 patient  
248 plasma: a) from the whole proteome (A); b) from fibrinogen- $\alpha$  (B); c) from fibrinogen- $\beta$  (C); d)  
249 from alpha-2-antiplasmin (D). Peptigram representation of the cleavage pattern of fibrinogen-  
250  $\alpha$  in the four patients at each time point (E).

251

252

#### **253 4. Discussion**

254 Omics approaches (metabolomics, proteomics, peptidomics, transcriptomics, genomics) to  
255 study disease, including acute illness, have become increasingly popular due to the unique  
256 multiscale insights they provide that can result in better targeted treatments (12,14,18-23).  
257 Several contributions have already been made to the field of COVID-19 by proteomics (24-  
258 27).

259 We have previously leveraged -omics analyses to test the hypothesis that dysregulated  
260 systemic proteolysis occurs in circulatory shock using a peptidomic-based assay, which  
261 estimates proteolysis by assessing the abundance and count of circulating peptides (13,14).  
262 Analysis of the plasma peptidome by this method showed an association between enhanced  
263 proteolysis and death (14) in septic shock caused by bacterial infection. Therefore, we  
264 investigated whether a similar association may also be found in viral sepsis caused by  
265 COVID-19 infection with bacterial superinfection developing over the course of the ICU stay.  
266 To better characterize and quantify the dynamic aspect of systemic intravascular proteolysis,

267 proteolytic activity generated by proteases that are known to be activated in acute illness,  
268 such as clotting factors and other serine proteases were measured.

269 Protease activity patterns showed a marked increase of Factor VII and Factor IX activity on  
270 day 7 in the patient who died of superinfection. In particular, the spike in Factor VII activity  
271 was unique amongst our sample cohort and represents an 80-fold increase in activity relative  
272 to that found in healthy control plasma. Further, the same trend in activity was also found in  
273 two substrates identified by the C-terminus cleavage sites Val-Arg and Leu-Arg,  
274 representative of tryptic-like proteolytic activity. Although the activity of all four substrates  
275 (Factor VII, Factor IX, Val-Arg, Leu-Arg) tended to decrease after the initial increase, the peak  
276 on day 7 in Patient 3 coincided with the diagnosis of bacterial superinfection, and with an  
277 increase in peptide abundance, particularly from fibrinogen.

278 Most fibrinogen-derived peptides in Patient 3 on day 7 originated from the Fibrinopeptide A  
279 (FPA) domain, located at the N-terminal region of the fibrinogen A $\alpha$  chain (A $\alpha$  20-35), which  
280 is normally generated by thrombin cleavage of fibrinogen upon activation of the clotting  
281 cascade. FPA is a known biomarker of the activation of the coagulation system and was  
282 shown to be related to elevated inflammation in sepsis, including COVID-19-induced sepsis  
283 (28). Although thrombin was not shown to be overactivated, other serine proteases may  
284 contribute to fibrinogen cleavage at typical thrombin cleaving sites. Further, the  
285 underexpression of antithrombin-III and heparin cofactor II also hint at a decreased capacity  
286 to regulate thrombin and other protease activity, regardless of thrombin expression and  
287 activity levels. Consistent with our prior findings on enhanced proteolysis over time in patients  
288 who died of septic shock (14), these findings may indicate a possible relationship between a  
289 surge in proteolytic activity in concert with impairment of the coagulation cascade and  
290 worsening overall clinical course after development of bacterial infection following the initial

291 progression of COVID-19 infection. This was apparent clinically in Patient 3 who had been on  
292 either phenylephrine or norepinephrine (but not both) for hypotension from admission to the  
293 ICU, and on day 7 necessitated the addition of two simultaneous pressor agents  
294 (norepinephrine and vasopressin) to maintain adequate hemodynamics. This pressor  
295 requirement subsequently increased the following day to three simultaneous pressor agents  
296 (norepinephrine, phenylephrine, and vasopressin) before later subsiding.

297 As COVID-19 infection has a strong association with coagulopathy (29,30), we focused our  
298 study on the activity of enzymes involved in the clotting cascade and other trypsin-like  
299 proteases, which could be characterized by a similar array of target proteins, including but  
300 not limited to coagulation enzymes and proteins such as fibrinogen. Thromboembolism and  
301 reports of microvascular thrombi akin to a disseminated intravascular coagulation (DIC)  
302 picture have been a common reported cause of death in patients admitted to the ICU with  
303 severe COVID-19. Although the cause of death in Patient 3 was classified as septic shock,  
304 the possible association between enhanced proteolytic activity, bacterial superinfection and  
305 disease severity is nonetheless of interest and could point to i) the presence of additional  
306 pathological mechanisms (i.e., proteolysis) that contribute to poor outcomes; ii) the  
307 relationship between enzymatic activity patterns and bacterial superinfection that causes  
308 further illness, in addition to that already seen with precedent viral infection.

309 The association between disease severity and -omics patterns is also supported by the  
310 measurements of other proteins that play a role in immunity and inflammation. For instance,  
311 the trends in expression of ficolin-1 and VEGFR2, and to some extent C-reactive protein  
312 (which showed a decrease over time in all four patients, much milder in Patient 3 though)  
313 correlate with the exacerbation of the inflammatory state of Patient 3 following diagnosis of  
314 bacterial superinfection. Ficolin-1 is a known activator of the complement system and innate

315 immunity through recognition of pathogen-associated molecular patterns (PAMPs) (31,32),  
316 while VEGFR2 has been related to COVID-19 progression (33) as also suggested by the  
317 hypothesis that the VEGF receptor activator (PMC18457) may serve as a biomarker for  
318 detecting the progression of COVID-19 (34). In fact, the patient with the least severe course  
319 of disease (Patient 2) had the lowest VEGFR2 intensity and, importantly, was the only patient  
320 who was not diagnosed with ARDS. Patient 4, on the other hand, had rheumatoid arthritis  
321 and subsequently greater VEGFR2 intensity. These observations highlight that the complexity  
322 of the interplay between baseline comorbidities, severity of the disease and variability of the  
323 features of immune and inflammatory responses prevents from interpreting conclusively the  
324 expression trends of complement factors and warrants further research in the future.

325 There are some limitations of this study that need to be acknowledged. First, regarding the  
326 clinically (obtained from the patient record) derived data, the low sample size of the studied  
327 patient population and non-uniformity in the timing of some laboratory results hinders the  
328 ability to make stronger inferences than are made here; the robustness of the presented  
329 results would doubtlessly have been strengthened with a larger sample size and fewer  
330 missing data. However, even with this very limited sample size we were able to make some  
331 cautious conclusions as to new hypotheses of molecular mechanisms that might otherwise  
332 not be recognized with a larger patient population. Second, regarding data drop-out, this was  
333 a real-world observational study, and the clinical laboratory measurements and values reflect  
334 patient management of severely ill COVID+ patients in the ICU. Third, in our analytical  
335 protocol, the mass spectrometry approach was necessarily untargeted; if specific protein  
336 systems and products of their degradation were targeted, it is possible that the potential  
337 dysfunction in these systems (e.g., coagulation, complement, etc.) could be highlighted in  
338 greater detail. Finally, when comparing and integrating proteomics and peptidomics data, the

339 availability of transcriptomics data, which were not part of the experimental design of this  
340 observational study, could add information on protein regulation, and help understand to a  
341 greater depth the impact of abnormal proteolysis and protein synthesis, breakdown, and  
342 turnover.

343 In conclusion, we demonstrate here that the analysis of the circulating proteome and  
344 peptidome, coupled with quantitation of enzymatic activity in plasma of COVID-19 patients,  
345 provides additional data about the progression of the disease. Our approach could prove  
346 particularly useful for achieving a more comprehensive description of the impairment of the  
347 activation and regulation of coagulation, a complex, protease-mediated system which plays  
348 a critical role in the management of acute patients in the ICU. The association between  
349 proteolytic activity and protease expression patterns achieved by mass spectrometry  
350 investigation of plasma and bacterial superinfection in COVID-19 may also contribute to  
351 anticipate the signs of possible superinfection and aid in the early diagnosis and delivery of a  
352 timely therapy.

353

354

### 355 **Conflict of Interest**

356 The authors declare that the research was conducted in the absence of any commercial or  
357 financial relationships that could be construed as a potential conflict of interest.

358

### 359 **Funding**

360 California Breast Cancer Research Program of the University of California, RGPO Grant  
361 R01RG3766 (R00RG2541) (to E.B.K.); US ARMY MEDICAL RESEARCH ACQUISITION  
362 ACTIVITY (USAMRAA) Award #W81XWH-17-2-0047 (to E.B.K.).

363

364



## 365 **References**

- 366 1. Wiersing WJ, Rhodes A, Cheng AC, Peacock SJ, Prescott HC. Pathophysiology,  
367 Transmission, Diagnosis, and Treatment of Coronavirus Disease 2019 (COVID-19): A  
368 Review. *JAMA* (2020) 324(8):782-93.
- 369 2. Osuchowski MF, Aletti F, Cavaillon JM, Flohé SB, Giamarellos-Bourboulis EJ, Huber-  
370 Lang M, Relja B, Skirecki T, Szabó A, Maegele M. SARS-CoV-2/COVID-19: Evolving  
371 Reality, Global Response, Knowledge Gaps, and Opportunities. *Shock* (2020)  
372 54(4):416-37.
- 373 3. Osuchowski MF, Winkler MS, Skirecki T, Cajander S, Shankar-Hari M, Lachmann G,  
374 Monneret G, Venet F, Bauer M, Brunkhorst FM, Weis S, Garcia-Salido A, Kox M,  
375 Cavaillon JM, Uhle F, Weigand MA, Flohé SB, Wiersinga WJ, Almansa R, de la Fuente  
376 A, Martin-Loeches I, Meisel C, Spinetti T, Schefold JC, Cilloniz C, Torres A, Giamarellos-  
377 Bourboulis EJ, Ferrer R, Girardis M, Cossarizza A, Netea MG, van der Poll T, Bermejo-  
378 Martín JF, Rubio I. The COVID-19 puzzle: deciphering pathophysiology and phenotypes  
379 of a new disease entity. *Lancet Respir Med* (2021) 9(6):622-42.
- 380 4. Lopes-Pacheco M, Silva PL, Cruz FF, Battaglini D, Robba C, Pelosi P, Morales MM,  
381 Caruso Neves C, Rocco PRM. Pathogenesis of Multiple Organ Injury in COVID-19 and  
382 Potential Therapeutic Strategies. *Front Physiol* (2021);12:593223.
- 383 5. Welte T, Ambrose LJ, Sibbring GC, Sheikh S, Müllerová H, Sabir I. Current evidence for  
384 COVID-19 therapies: a systematic literature review. *Eur Respir Rev* (2021)  
385 30(159):200384.
- 386 6. Chalmers JD, Crichton ML, Goeminne PC, Cao B, Humbert M, Shteinberg M, Antoniou  
387 KM, Ulrik CS, Parks H, Wang C, Vandendriessche T, Qu J, Stolz D, Brightling C, Welte  
388 T, Aliberti S, Simonds AK, Tonia T, Roche N. Management of hospitalised adults with  
389 coronavirus disease 2019 (COVID-19): a European Respiratory Society living guideline.  
390 *Eur Respir J* (2021) 57(4):2100048.
- 391 7. Alhazzani W, Evans L, Alshamsi F, Møller MH, Ostermann M, Prescott HC, Arabi YM,  
392 Loeb M, Ng Gong M, Fan E, Oczkowski S, Levy MM, Derde L, Dzierba A, Du B, Machado  
393 F, Wunsch H, Crowther M, Cecconi M, Koh Y, Burry L, Chertow DS, Szczeklik W, Belle-  
394 Cote E, Greco M, Bala M, Zarychanski R, Kesecioglu J, McGeer A, Mermel L, Mammen  
395 MJ, Nainan Myatra S, Arrington A, Kleinpell R, Citerio G, Lewis K, Bridges E, Memish  
396 ZA, Hammond N, Hayden FG, Alshahrani M, Al Duhailib Z, Martin GS, Kaplan LJ,  
397 Coopersmith CM, Antonelli M, Rhodes A. Surviving Sepsis Campaign Guidelines on the  
398 Management of Adults With Coronavirus Disease 2019 (COVID-19) in the ICU: First  
399 Update. *Crit Care Med* (2021) 49(3):e219-e234.
- 400 8. Tang Y, Liu J, Zhang D, Xu Z, Ji J, Wen C. Cytokine Storm in COVID-19: The Current  
401 Evidence and Treatment Strategies. *Front Immunol* (2020) 11:1708.
- 402 9. Iba T, Levy JH, Levi M, Thachil J. Coagulopathy in COVID-19. *J Thromb Haemost* (2020)  
403 18(9):2103-9.
- 404 10. Garcia-Vidal C, Sanjuan G, Moreno-García E, Puerta-Alcalde P, Garcia-Pouton N,  
405 Chumbita M, Fernandez-Pittol M, Pitart C, Inciarte A, Bodro M, Morata L, Ambrosioni J,  
406 Grafia I, Meira F, Macaya I, Cardozo C, Casals C, Tellez A, Castro P, Marco F, Garcia  
407 F, Mensa J, Martínez JA, Soriano A; COVID-19 Researchers Group. Incidence of co-  
408 infections and superinfections in hospitalized patients with COVID-19: a retrospective  
409 cohort study. *Clin Microbiol Infect* (2021) 27(1):83-8.
- 410 11. Lazzaroni MG, Piantoni S, Masneri S, Garrafa E, Martini G, Tincani A, Andreoli L,  
411 Franceschini F. Coagulation dysfunction in COVID-19: The interplay between  
412 inflammation, viral infection and the coagulation system. *Blood Rev* (2021) 46:100745.

- 413 12. Aletti F, Conti C, Ferrario M, Ribas V, Bollen Pinto B, Herpain A, Post E, Romay Medina  
414 E, Barlassina C, de Oliveira E, Pastorelli R, Tedeschi G, Ristagno G, Taccone FS,  
415 Schmid-Schönbein GW, Ferrer R, De Backer D, Bendjelid K, Baselli G. ShockOmics:  
416 multiscale approach to the identification of molecular biomarkers in acute heart failure  
417 induced by shock. *Scand J Trauma Resusc Emerg Med* (2016);24:9.
- 418 13. Aletti F, Maffioli E, Negri A, Santamaria MH, DeLano FA, Kistler EB, Schmid-Schönbein  
419 GW, Tedeschi G. Peptidomic Analysis of Rat Plasma: Proteolysis in Hemorrhagic Shock.  
420 *Shock* (2016) 45(5):540-54.
- 421 14. Bauzá-Martinez J, Aletti F, Pinto BB, Ribas V, Odena MA, Díaz R, Romay E, Ferrer R,  
422 Kistler EB, Tedeschi G, Schmid-Schönbein GW, Herpain A, Bendjelid K, de Oliveira E.  
423 Proteolysis in septic shock patients: plasma peptidomic patterns are associated with  
424 mortality. *Br J Anaesth* (2018) 121(5):1065-74.
- 425 15. Aletti F, DeLano FA, Maffioli E, Mu H, Schmid-Schönbein GW, Tedeschi G, Kistler EB.  
426 Continuous enteral protease inhibition as a novel treatment for experimental  
427 trauma/hemorrhagic shock. *Eur J Trauma Emerg Surg* (2021). Online ahead of print.
- 428 16. Maffioli E, Jiang Z, Nonnis S, Negri A, Romeo V, Lietz CB, Hook V, Ristagno G, Baselli  
429 G, Kistler EB, Aletti F, O'Donoghue AJ, Tedeschi G. High-Resolution Mass  
430 Spectrometry-Based Approaches for the Detection and Quantification of Peptidase  
431 Activity in Plasma. *Molecules* (2020) 25(18):4071.
- 432 17. Manguy J, Jehl P, Dillon ET, Davey NE, Shields DC, Holton TA. Peptigram: A Web-  
433 Based Application for Peptidomics Data Visualization. *J Proteome Res* (2017) 16(2):712-  
434 19
- 435 18. Cambiaghi A, Pinto BB, Brunelli L, Falcetta F, Aletti F, Bendjelid K, Pastorelli R, Ferrario  
436 M. Characterization of a metabolomic profile associated with responsiveness to therapy  
437 in the acute phase of septic shock. *Sci Rep* (2017) 7(1):9748.
- 438 19. Sharma NK, Tashima AK, Brunialti MKC, Ferreira ER, Torquato RJS, Mortara RA,  
439 MacHado FR, Assuncao M, Rigato O, Salomao R. Proteomic study revealed cellular  
440 assembly and lipid metabolism dysregulation in sepsis secondary to community-  
441 acquired pneumonia (2017) *Sci Rep* 7:15606.
- 442 20. Cambiaghi A, Díaz R, Martinez JB, Odena A, Brunelli L, Caironi P, Masson S, Baselli G,  
443 Ristagno G, Gattinoni L, de Oliveira E, Pastorelli R, Ferrario M. An Innovative Approach  
444 for The Integration of Proteomics and Metabolomics Data In Severe Septic Shock  
445 Patients Stratified for Mortality. *Sci Rep* (2018) 8(1):6681.
- 446 21. Braga D, Barcella M, Herpain A, Aletti F, Kistler EB, Bollen Pinto B, Bendjelid K,  
447 Barlassina C. A longitudinal study highlights shared aspects of the transcriptomic  
448 response to cardiogenic and septic shock. *Crit Care* (2019) 23(1):414.
- 449 22. Schuurman AR, Reijnders TDY, Kullberg RFJ, Butler JM, van der Poll T, Wiersinga WJ.  
450 Sepsis: deriving biological meaning and clinical applications from high-dimensional data.  
451 *Intensive Care Med Exp* (2021) 9(1):27.
- 452 23. Mangioni D, Peri AM, Rossolini GM, Viaggi B, Perno CF, Gori A, Bandera A. Toward  
453 rapid sepsis diagnosis and patient stratification: What's new from microbiology and omics  
454 Science. *J Infect Dis* (2020) 221(7):1039-47.
- 455 24. Messner CB et al. Ultra-High-Throughput Clinical Proteomics Reveals Classifiers of  
456 COVID-19 Infection. *Cell Syst* (2020) 11(1):11-24.
- 457 25. Demichev V et al. A time-resolved proteomic and prognostic map of COVID-19. *Cell Syst*  
458 (2021) 12(8):780-94.
- 459 26. Haas P, Muralidharan M, Krogan NJ, Kaake RM, Hüttenhain R. Proteomic Approaches  
460 to Study SARS-CoV-2 Biology and COVID-19 Pathology. *J Proteome Res* (2021)  
461 20(2):1133-52.

- 462 27. McArdle A, Washington KE, Chazarin Orgel B, Binek A, Manalo DM, Rivas A, Ayres M,  
463 Pandey R, Phebus C, Raedschelders K, Fert-Bober J, Van Eyk JE. Discovery  
464 Proteomics for COVID-19: Where We Are Now. *J Proteome Res* (2021) Online ahead of  
465 print.
- 466 28. Ranucci M, Sitzia C, Baryshnikova E, Di Dedda U, Cardani R, Martelli F, Corsi Romanelli  
467 M. Covid-19-Associated Coagulopathy: Biomarkers of Thrombin Generation and  
468 Fibrinolysis Leading the Outcome. *J Clin Med* (2020) 9(11):3487.
- 469 29. Iba T, Levy JH, Levi M, Thachil J. Coagulopathy in COVID-19. *J Thromb Haemost* (2020)  
470 18(9):2103-9.
- 471 30. Asakura H, Ogawa H. COVID-19-associated coagulopathy and disseminated  
472 intravascular coagulation. *Int J Hematol* (2020) 7:1–13.
- 473 31. Bidula S, Sexton DW, Schelenz S. Ficolins and the Recognition of Pathogenic  
474 Microorganisms: An Overview of the Innate Immune Response and Contribution of  
475 Single Nucleotide Polymorphisms. *J Immunol Res* (2019) 2019:3205072
- 476 32. Polycarpou A, Howard M, Farrar CA, Greenlaw R, Fanelli G, Wallis R, Klavinskis LS,  
477 Sacks S. Rationale for targeting complement in COVID-19. *EMBO Mol Med* (2020)  
478 12(8):e12642.
- 479 33. Birnhuber A, Fließner E, Gorkiewicz G, Zacharias M, Seeliger B, David S, Welte T,  
480 Schmidt J, Olschewski H, Wygrecka M, Kwapiszewska G. Between inflammation and  
481 thrombosis: endothelial cells in COVID-19. *Eur Respir J* (2021) 58(3):2100377.
- 482 34. Kong Y, Han J, Wu X, Zeng H, Liu J, Zhang H. VEGF-D: a novel biomarker for detection  
483 of COVID-19 progression. *Crit Care* (2020) 24(1):373.
- 484

**Table 1.** Characteristics of COVID+ patient cohort

| Covariate                                   | Patient 1   | Patient 2   | Patient 3   | Patient 4                 |
|---------------------------------------------|-------------|-------------|-------------|---------------------------|
| BMI                                         | 29.40       | 23.66       | 32.14       | 30.19                     |
| Sex (M: male; F: female)                    | M           | M           | F           | M                         |
| Survived (Yes / No)                         | Y           | Y           | N           | Y                         |
| Admit to ICU from ED or Ward                | Ward        | ED          | Ward        | ED                        |
| ICU Length of Stay                          | 17          | 3           | 16          | 9                         |
| Hospital Length of Stay                     | 24          | 8           | 18          | 11                        |
| Self-described fitness level upon admission | Fit         | Fit         | Well        | Fit                       |
| Modified Rankin Score on admission          | No symptoms | No symptoms | No symptoms | No significant disability |
| <i>Treatment in ICU</i>                     |             |             |             |                           |
| Required pressors                           | Y           |             | Y           | Y                         |
| (ARDS) diagnosis                            | Y           |             | Y           | Y                         |
| Presence of another infection               |             |             | Y*          |                           |
| <i>Antibiotics received: Azithromycin</i>   | Y           | Y           | Y           | Y                         |
| <i>Ceftriaxone</i>                          | Y           | Y           |             | Y                         |
| <i>Meropenem</i>                            |             |             | Y           |                           |
| <i>Vancomycin</i>                           |             |             | Y           | Y                         |
| <i>Piperacillin/Tazobactam</i>              |             |             | Y           | Y                         |

485

486

**Table 2.** Main Laboratory Data

| Covariate                          | Patient 1    | Patient 2     | Patient 3     | Patient 4    |
|------------------------------------|--------------|---------------|---------------|--------------|
| White Blood Count ( $10^9/l$ )     |              |               |               |              |
| Average [SD]                       | 10.2 [1.5]   | 8.4 [0.8]     | 11.6 [4]      | 7.7 [1.7]    |
| (Range)                            | (7.6-12.3)   | (7.4-9.6)     | (8.1-19.8)    | (5.7-10.3)   |
| Hemoglobin (g/dl)                  |              |               |               |              |
| Average [SD]                       | 13.0 [1.3]   | 14.1 [1.2]    | 9.4 [1.6]     | 11.6 [1.6]   |
| (Range)                            | (12-15.4)    | (12.1-15.3)   | (6.4-11)      | (10.1-14.2)  |
| Platelets ( $\times 10^3 /\mu l$ ) |              |               |               |              |
| Average [SD]                       | 404.3 [85.9] | 300.0 [124.3] | 294.9 [157.2] | 153.5 [28.9] |
| (Range)                            | (223-468)    | (179-461)     | (170-608)     | (113-183)    |
| International Normalized Ratio     | 1.3 [0.1]    | 1.2 [0.1]     | 1.4 [0.0]     | NC           |
| Admission D-Dimer (ng/mL)          | 354          | NC            | 699           | NC           |

487

488

489

490

Average and range of laboratory blood tests from COVID-19 patients during their stay on ICU. Abbreviations: Standard Deviation (SD), Not collected (NC)



**A**

Patient 1

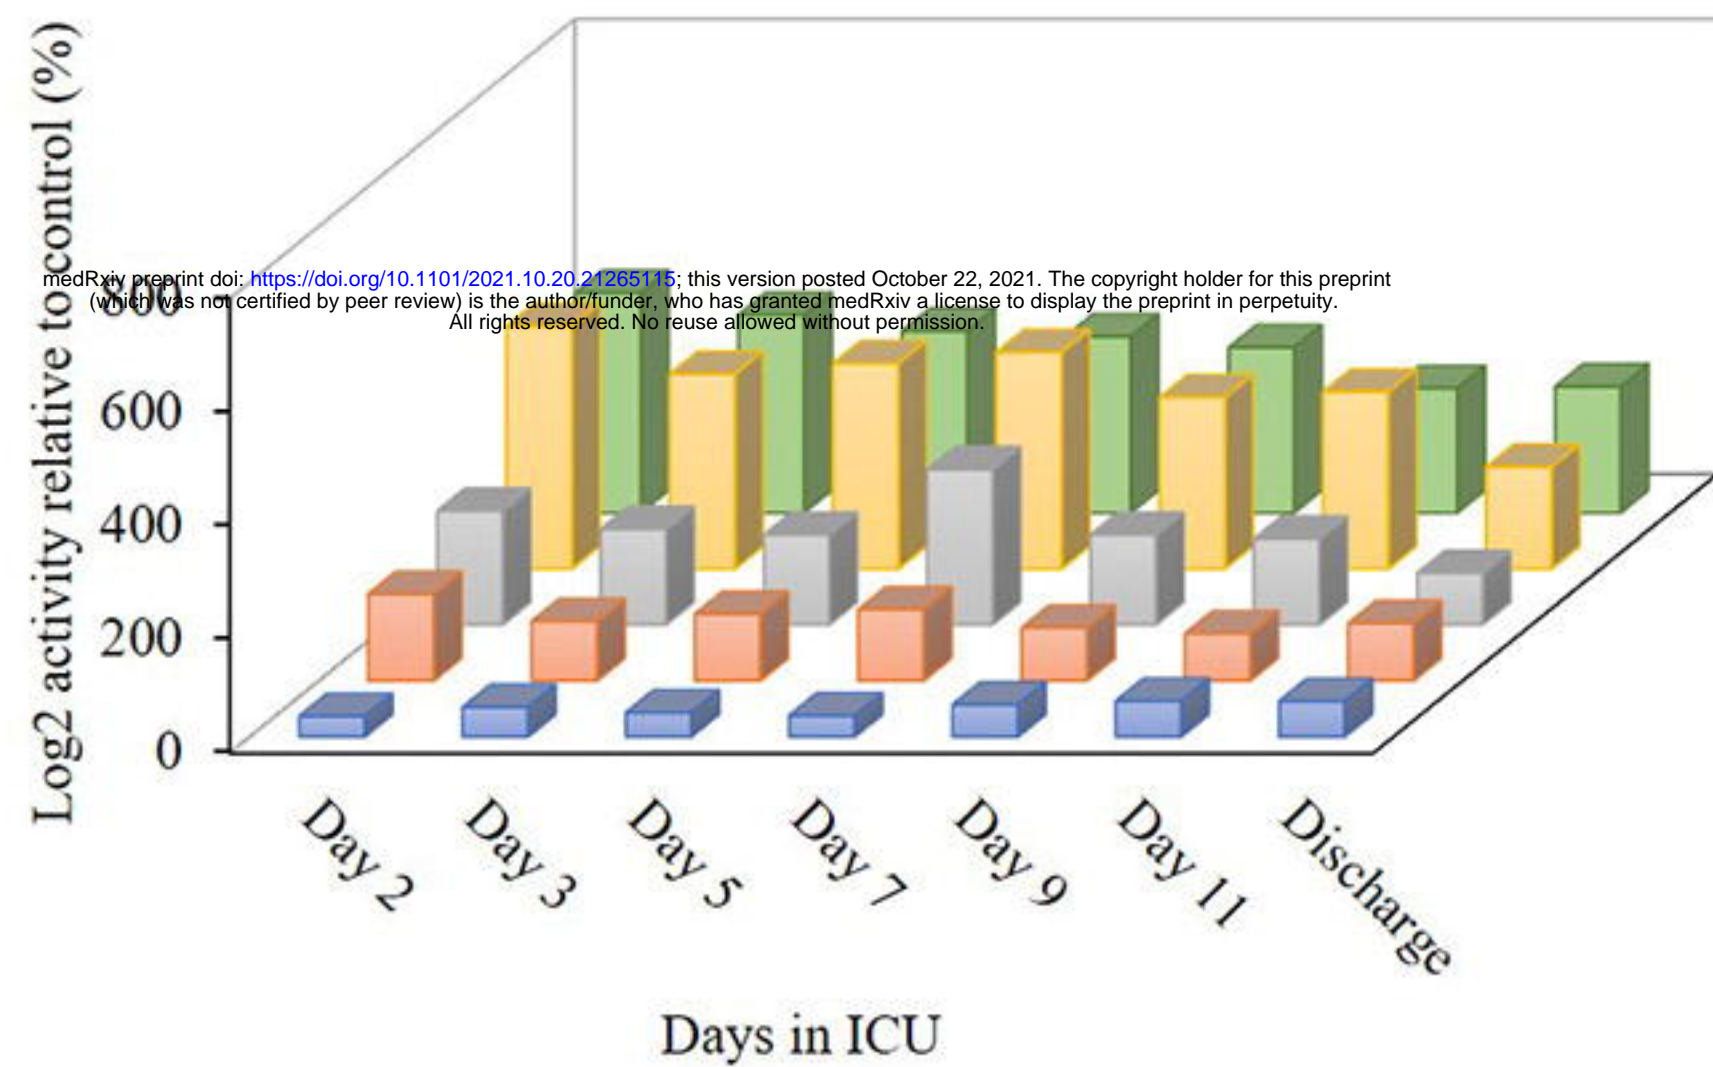**B**

Patient 2

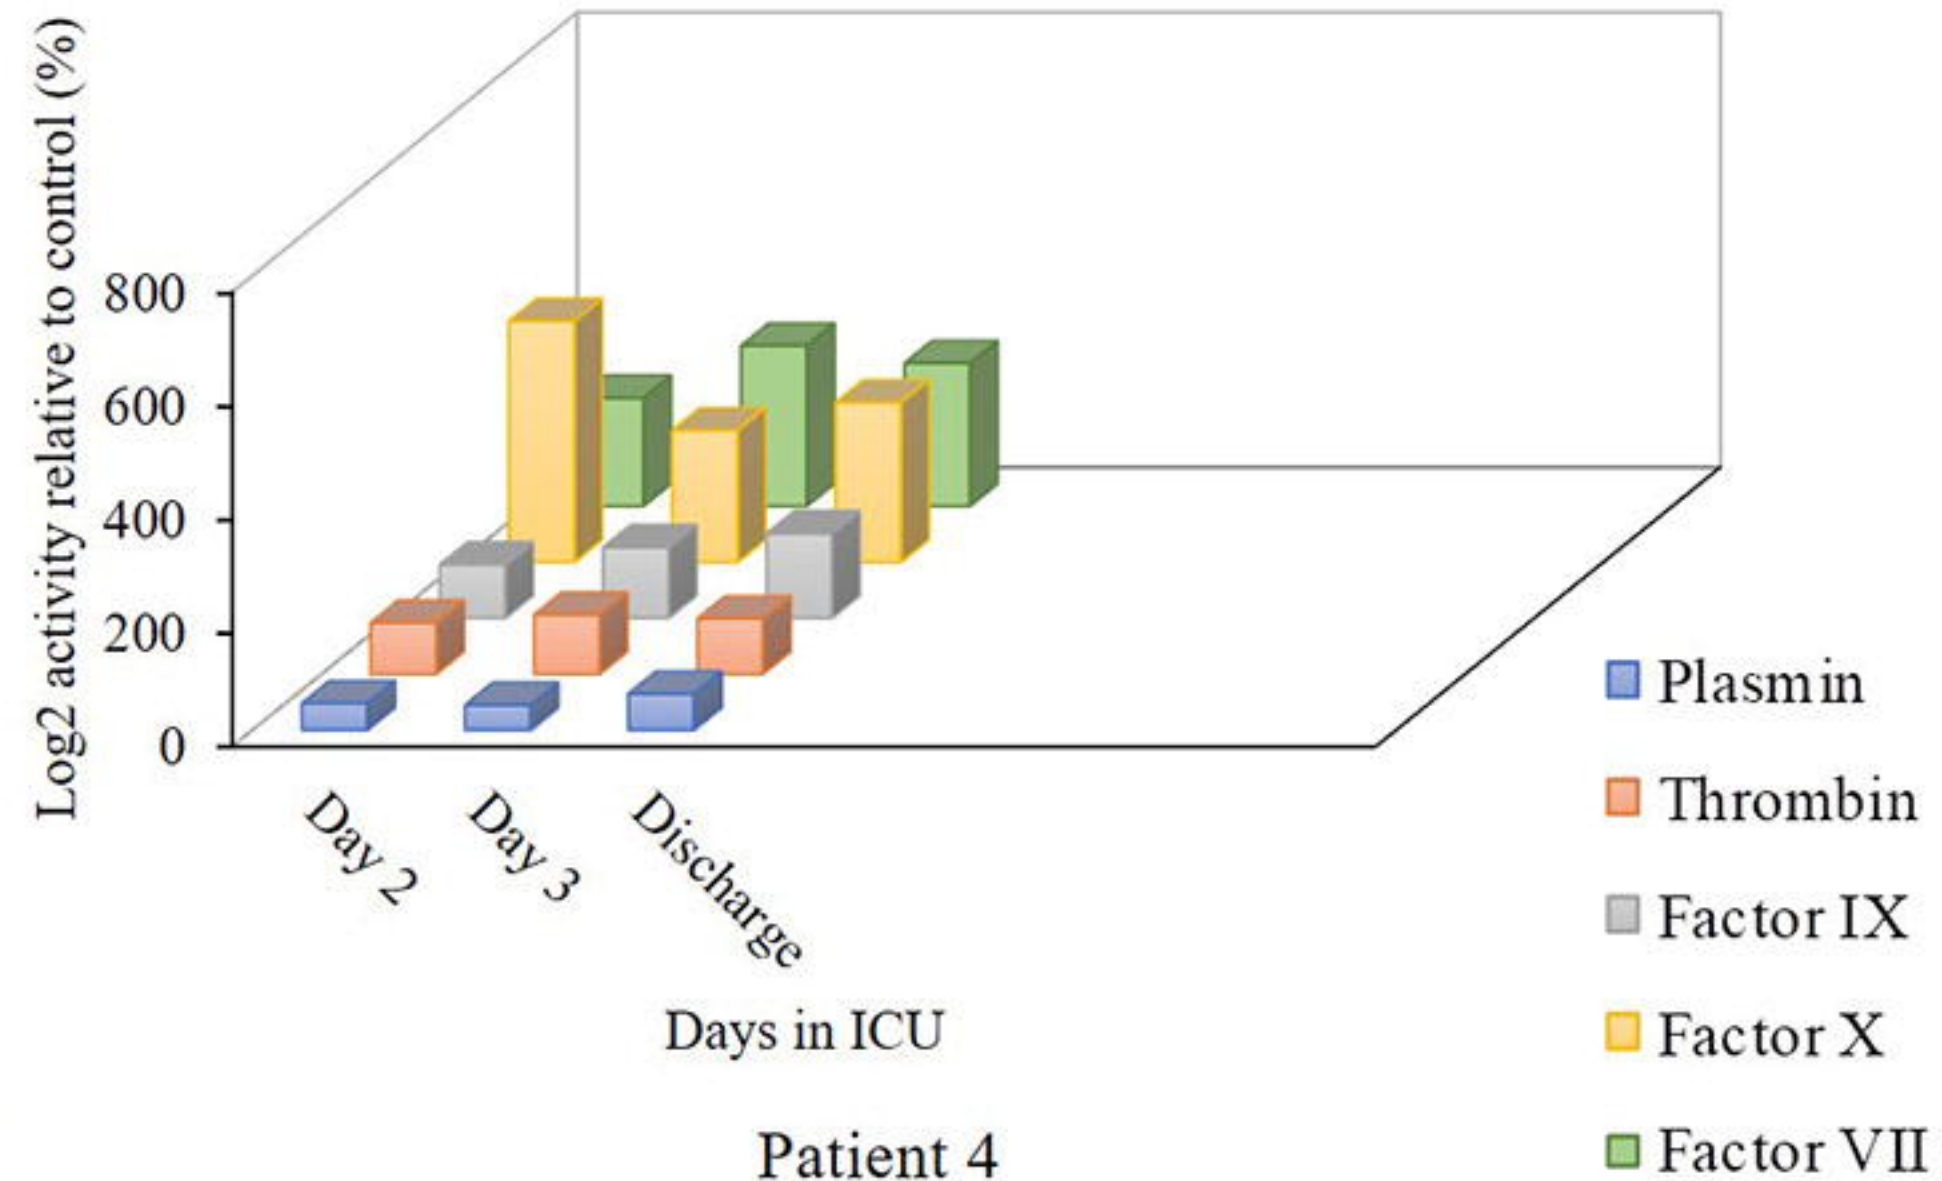**C**

Patient 3

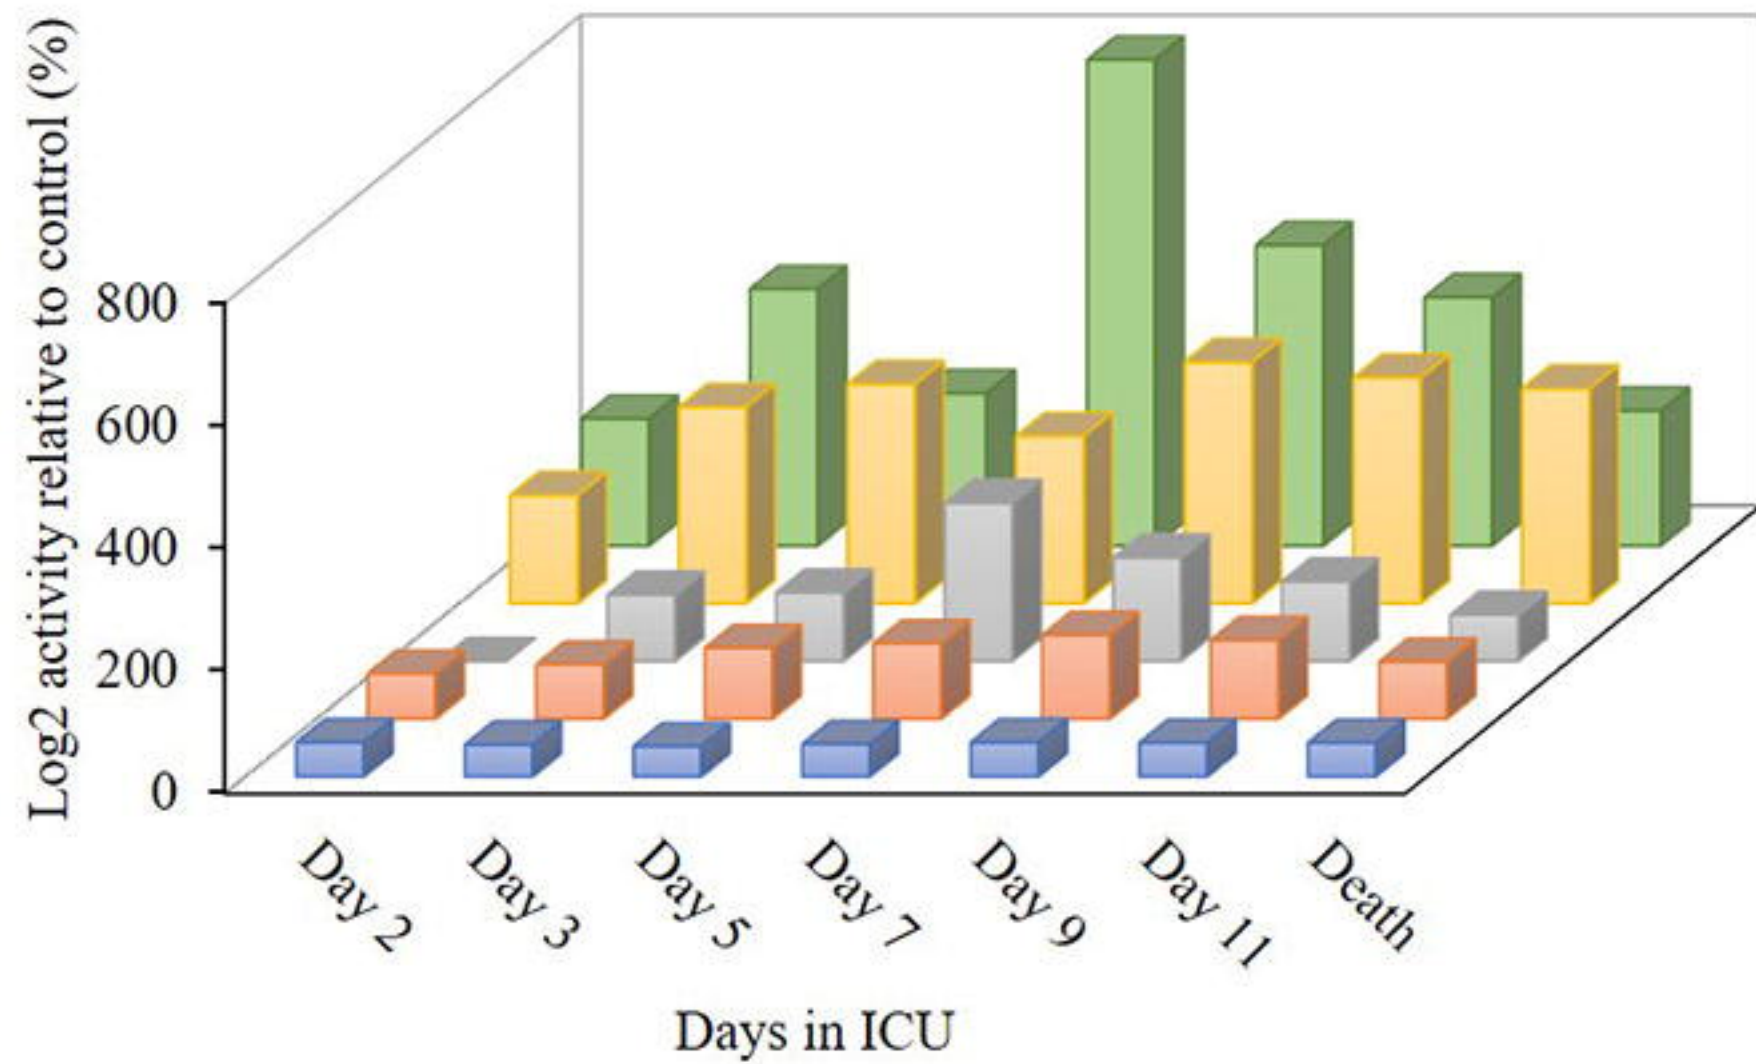**D**

Patient 4

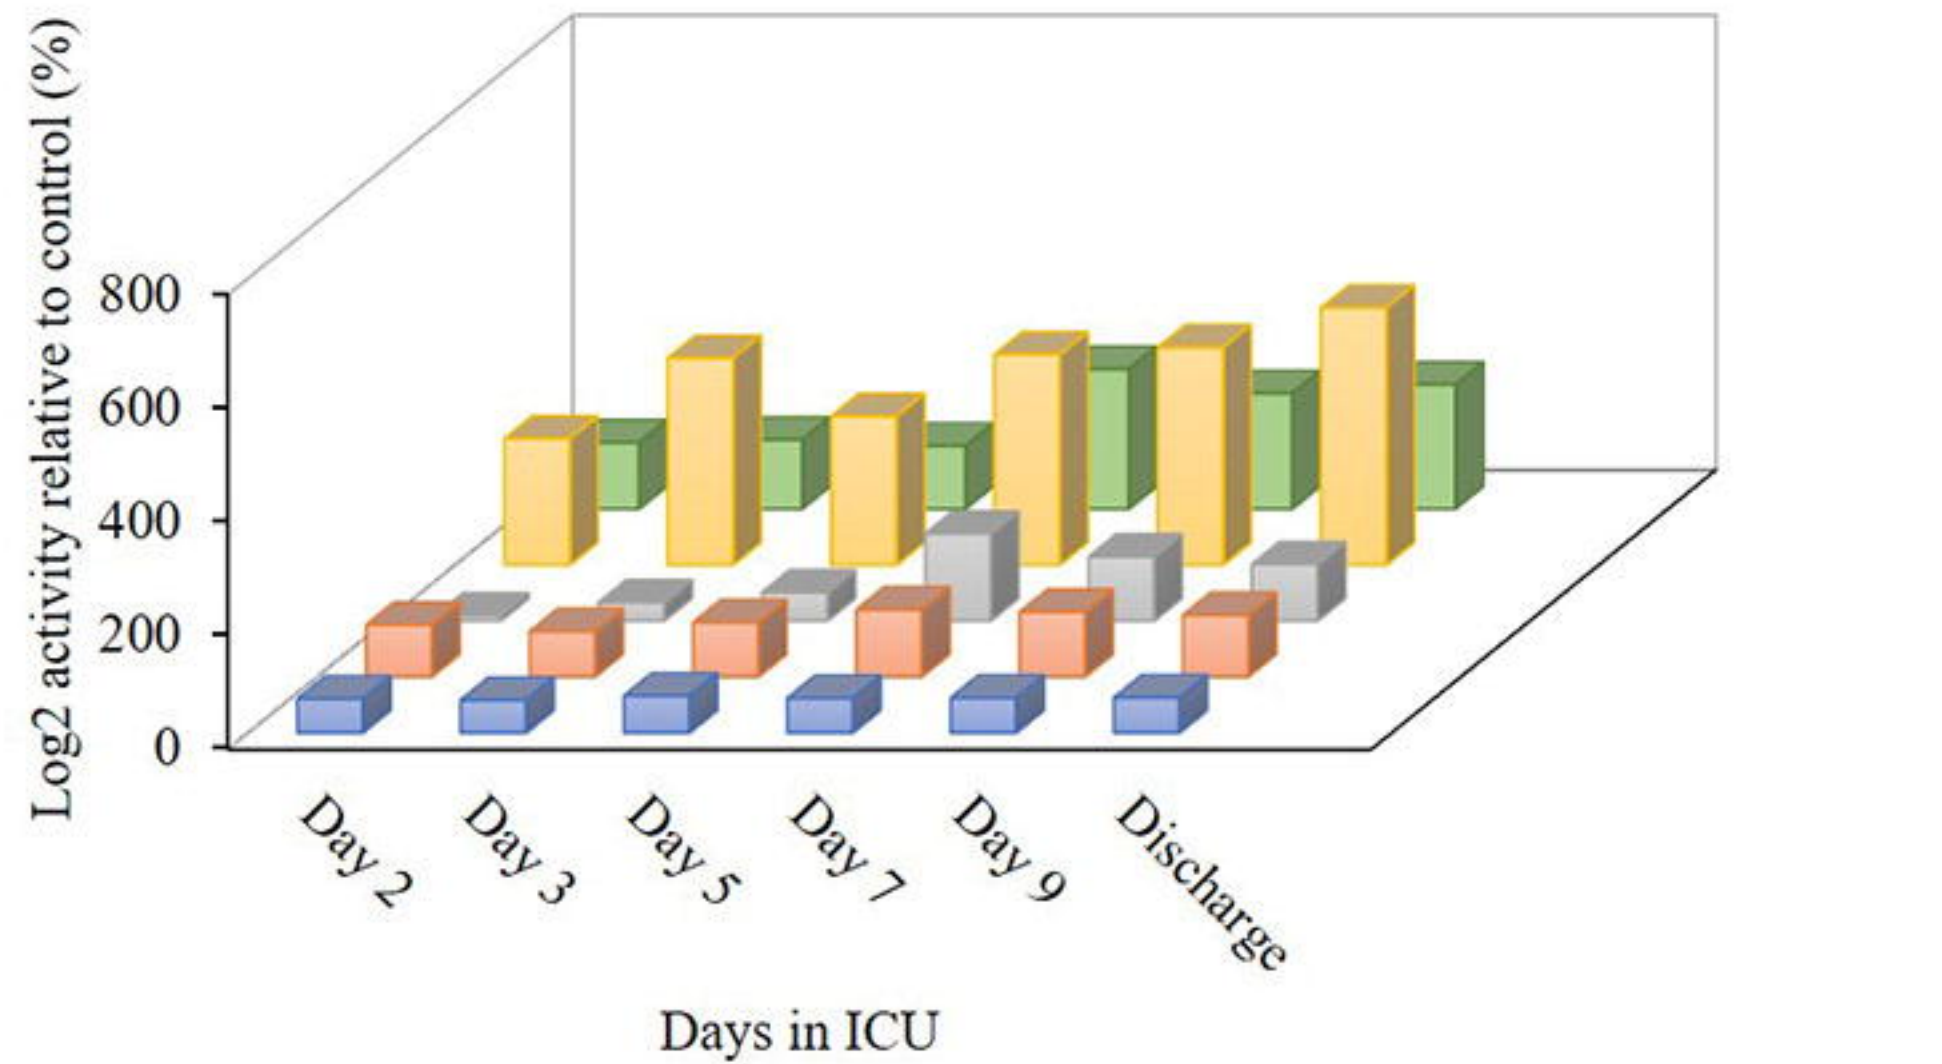



**A**

Patient 1

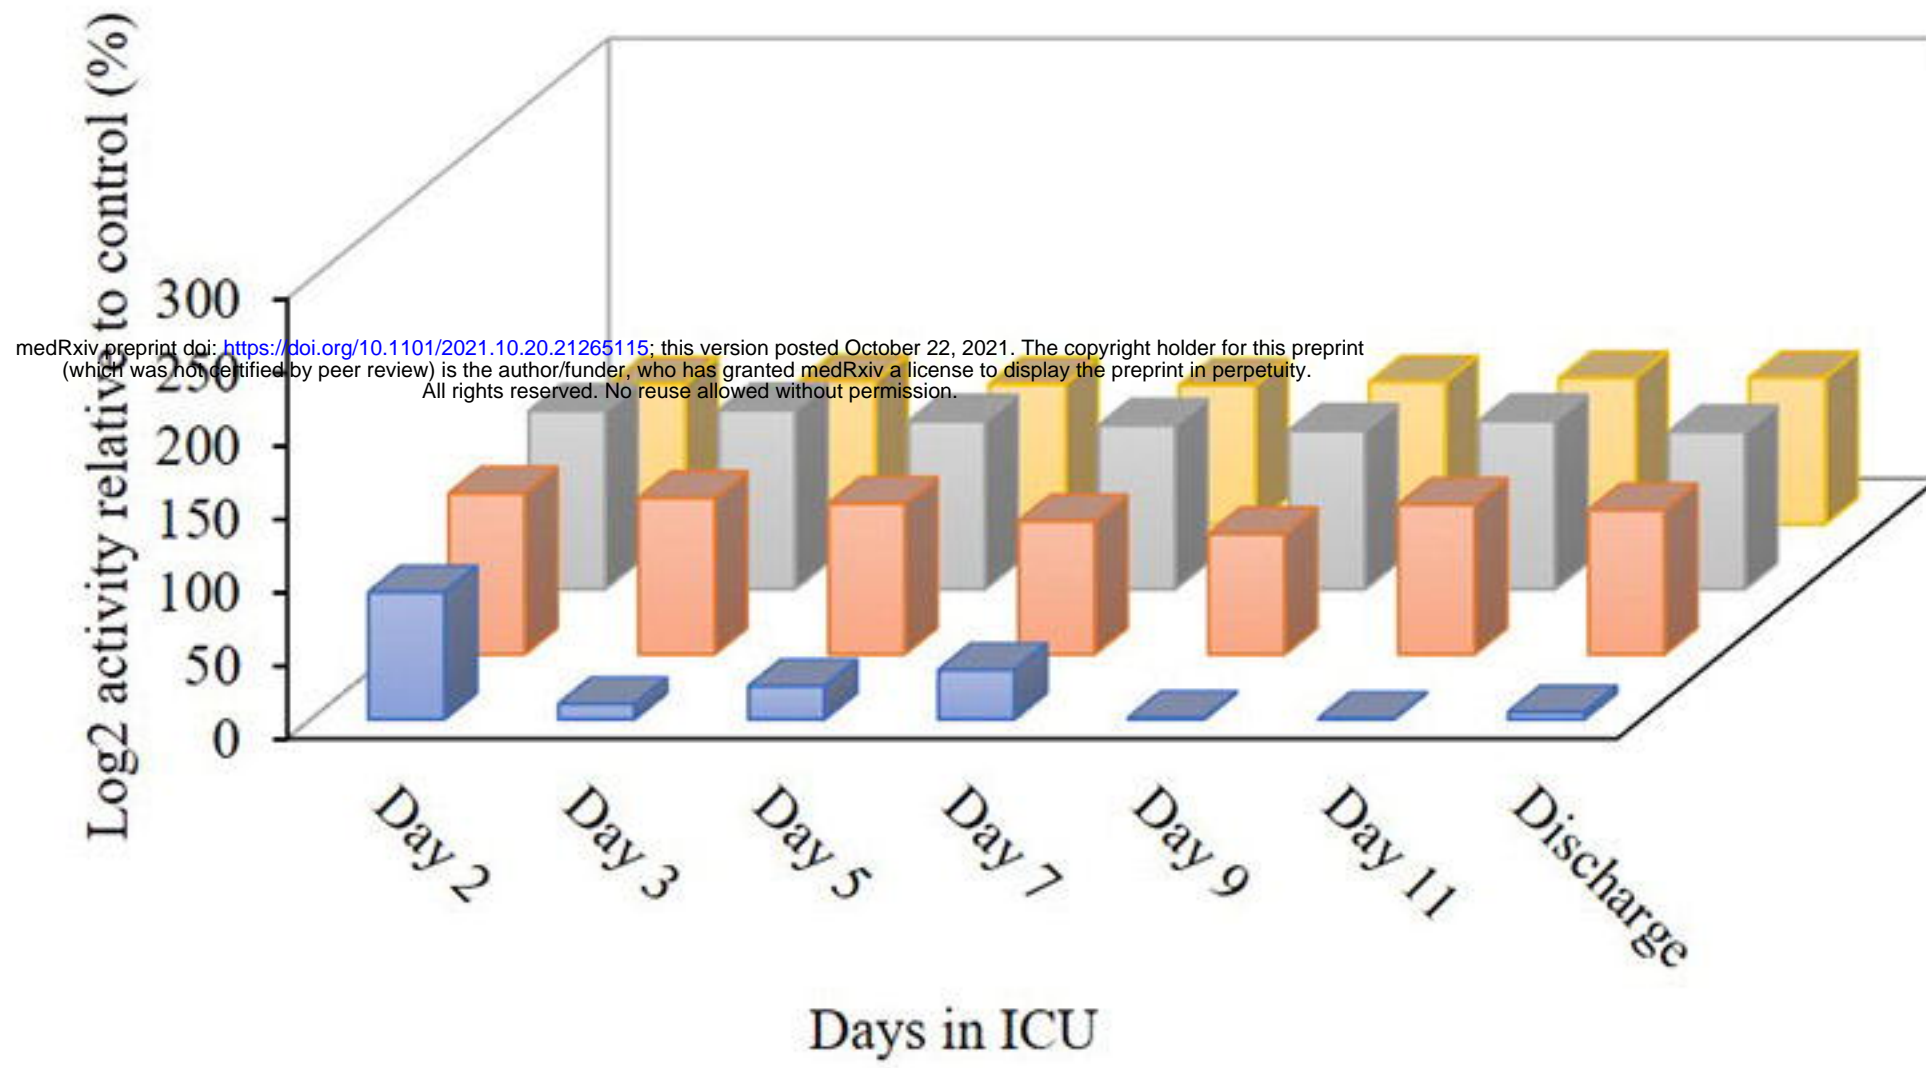**B**

Patient 2

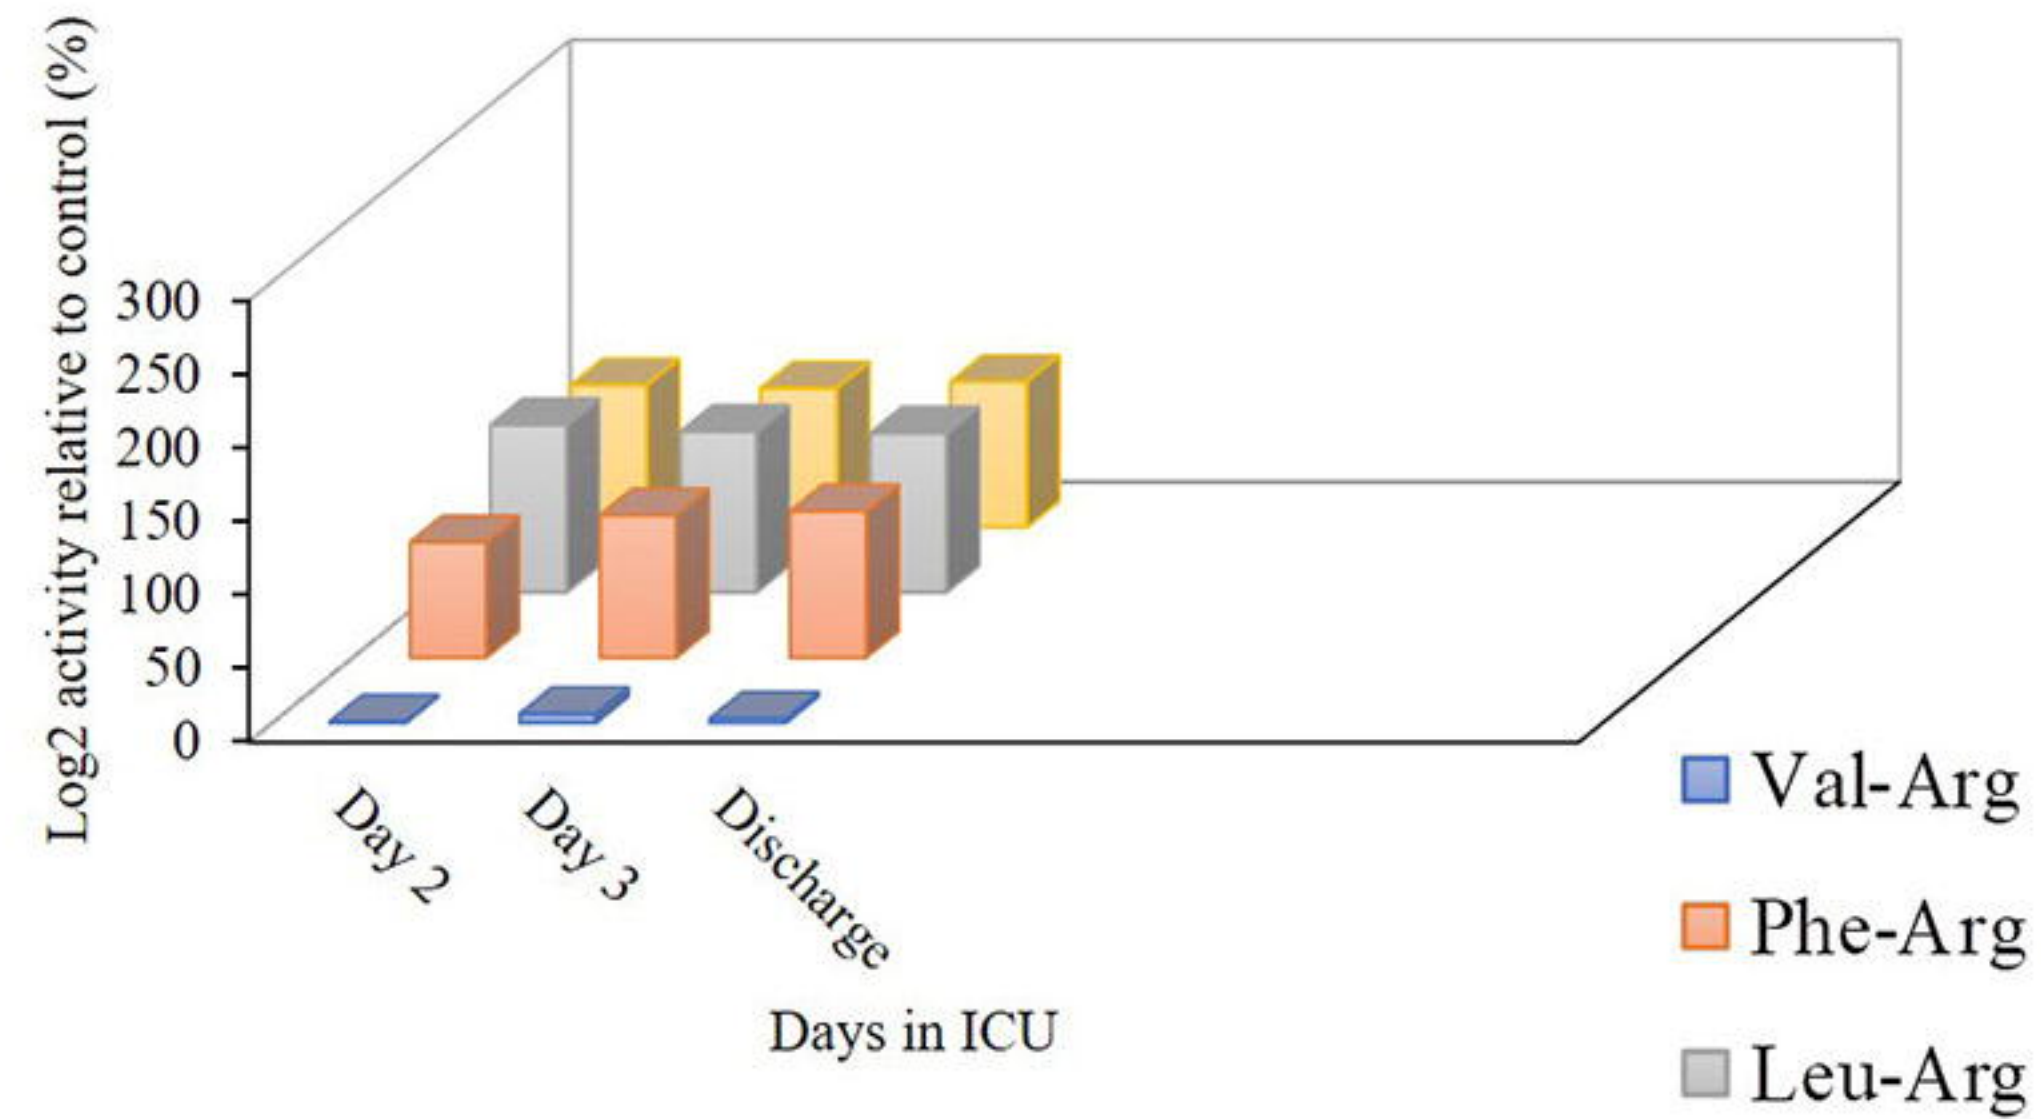**C**

Patient 3

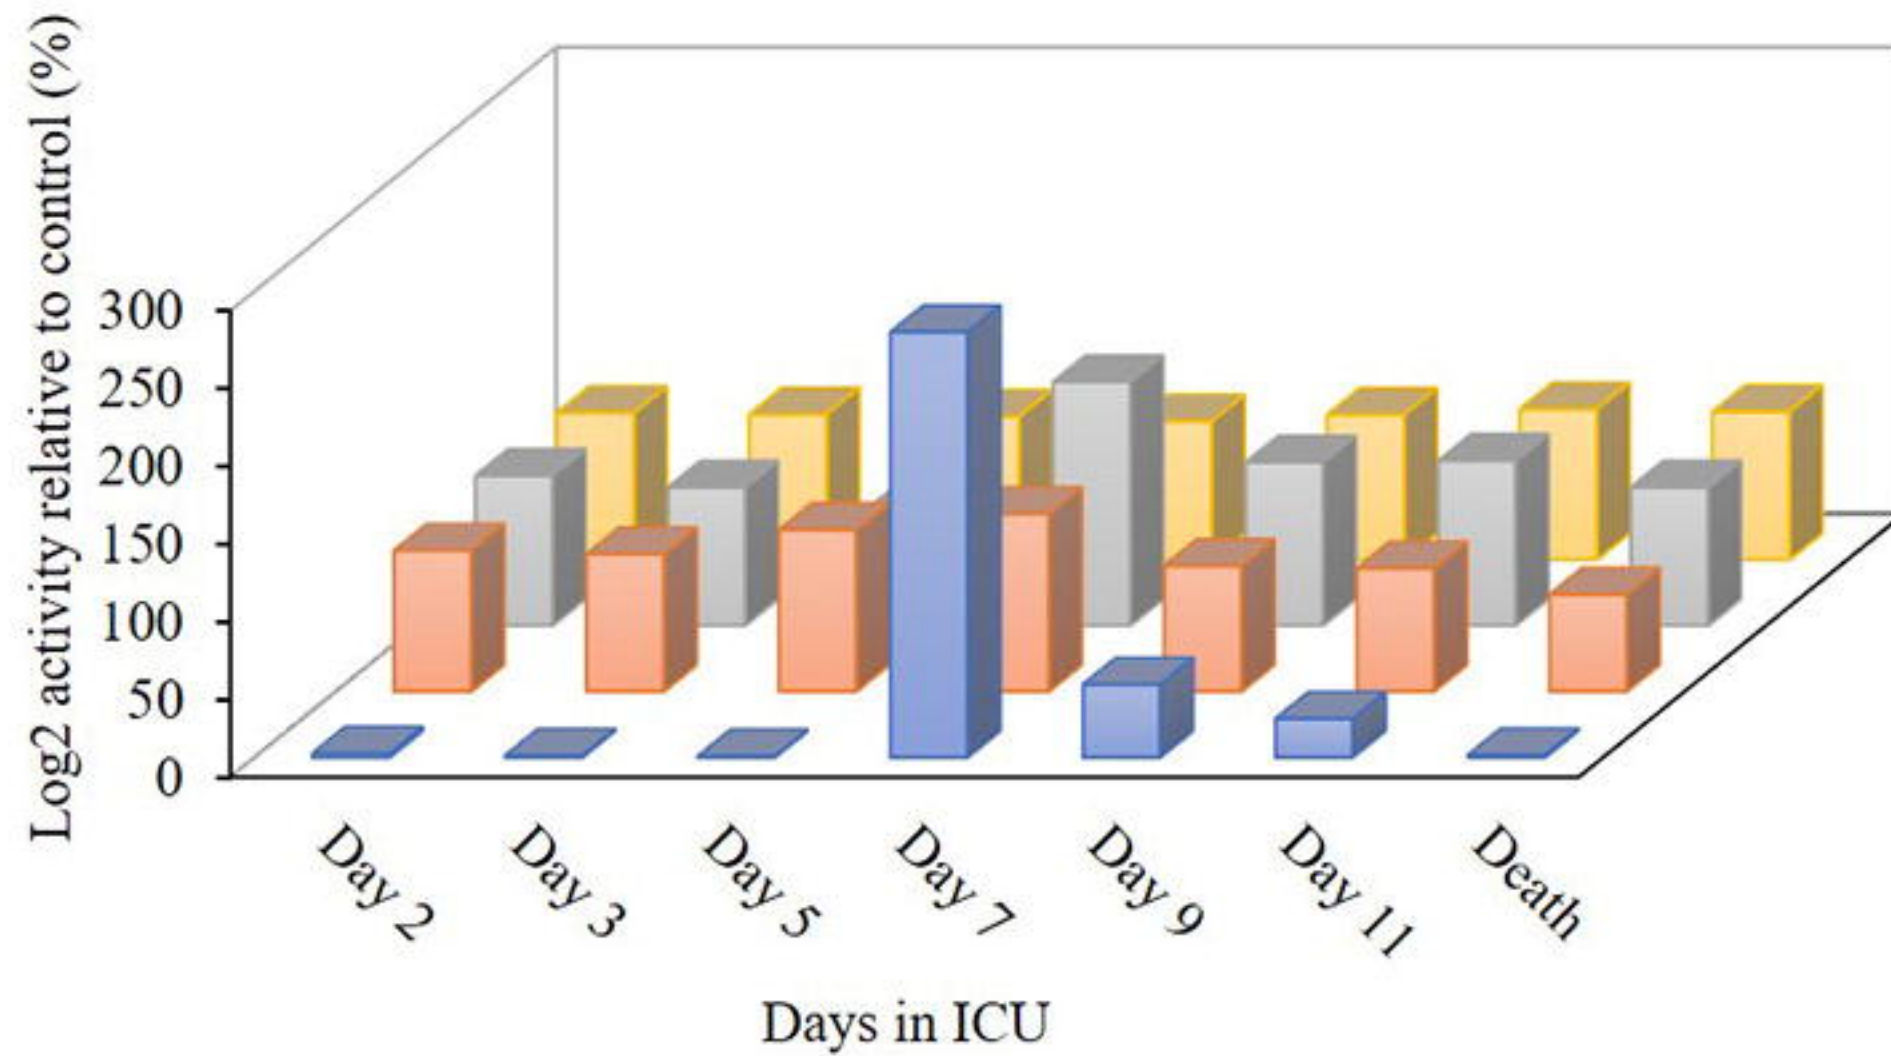**D**

Patient 4

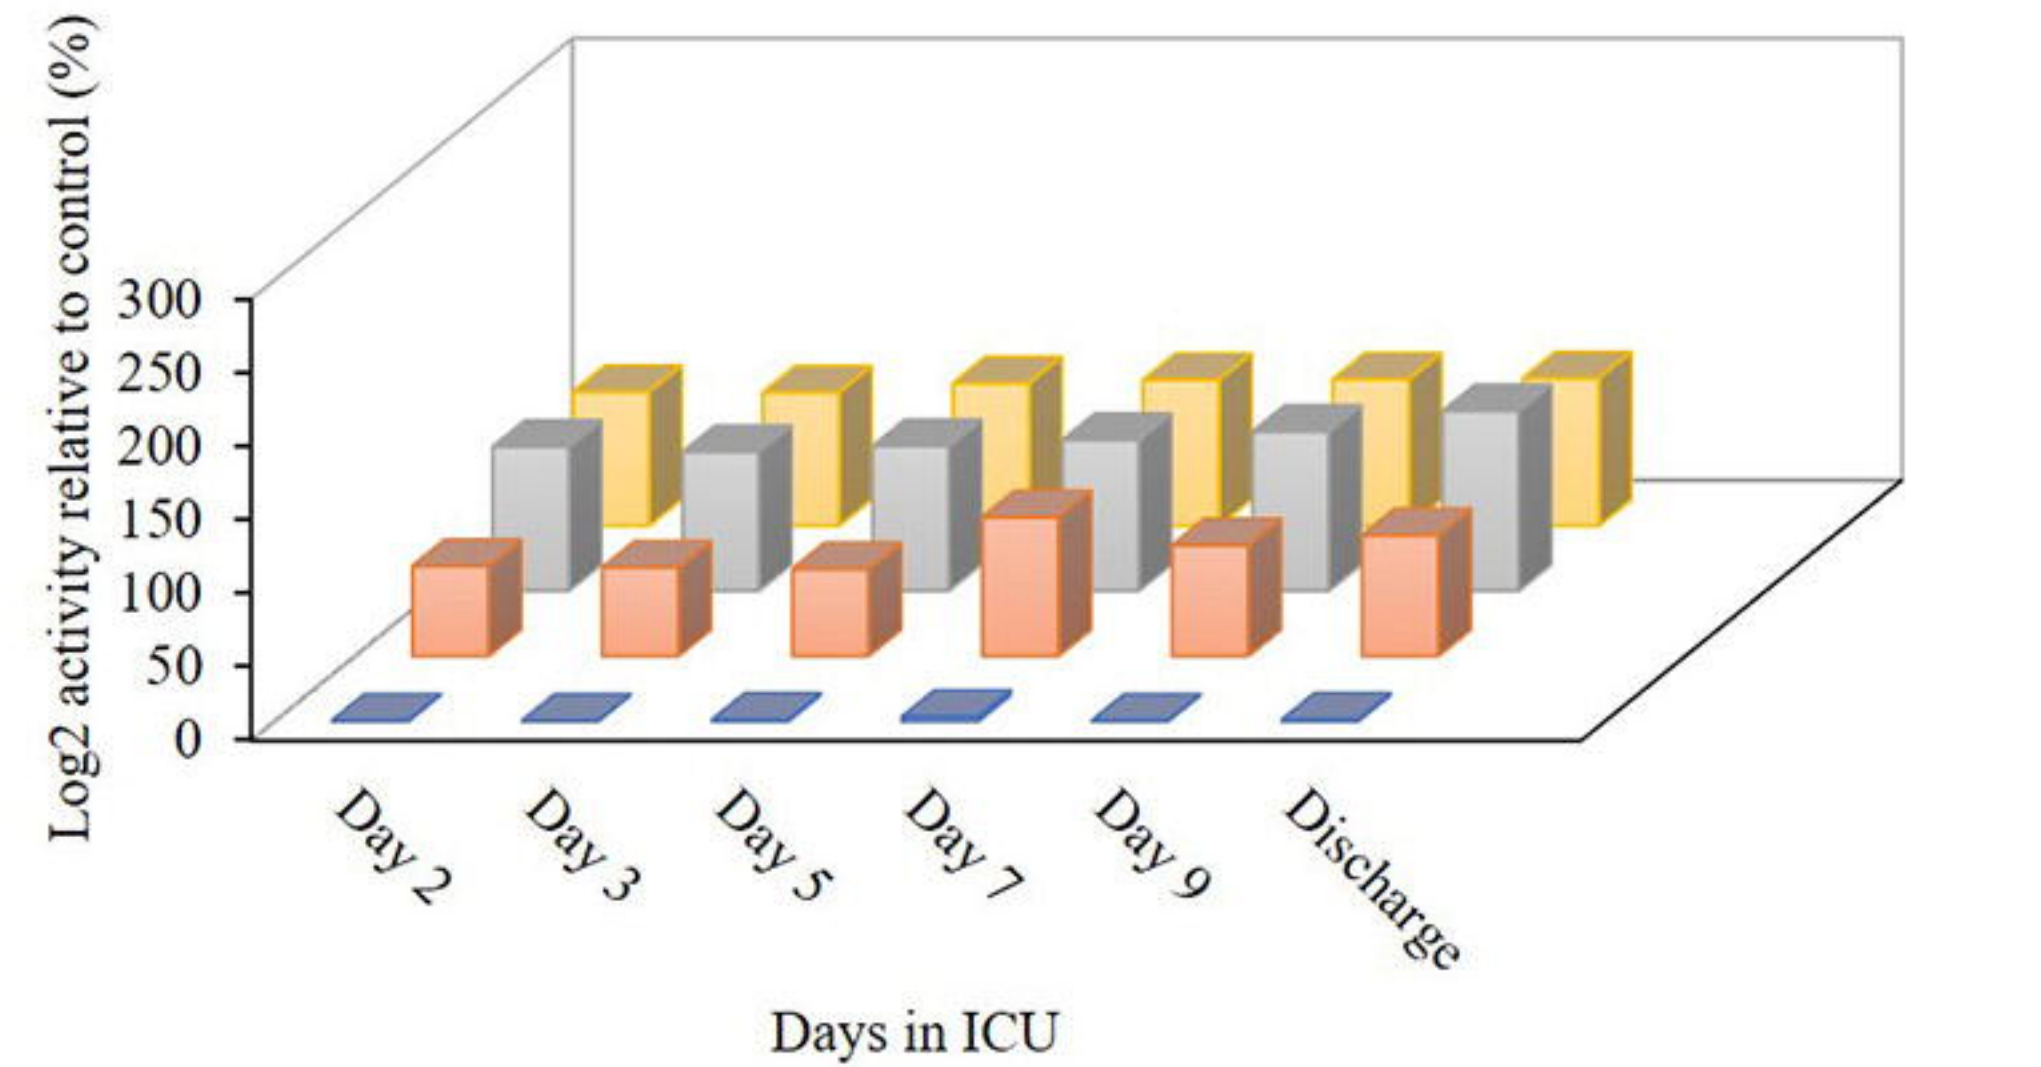



**A**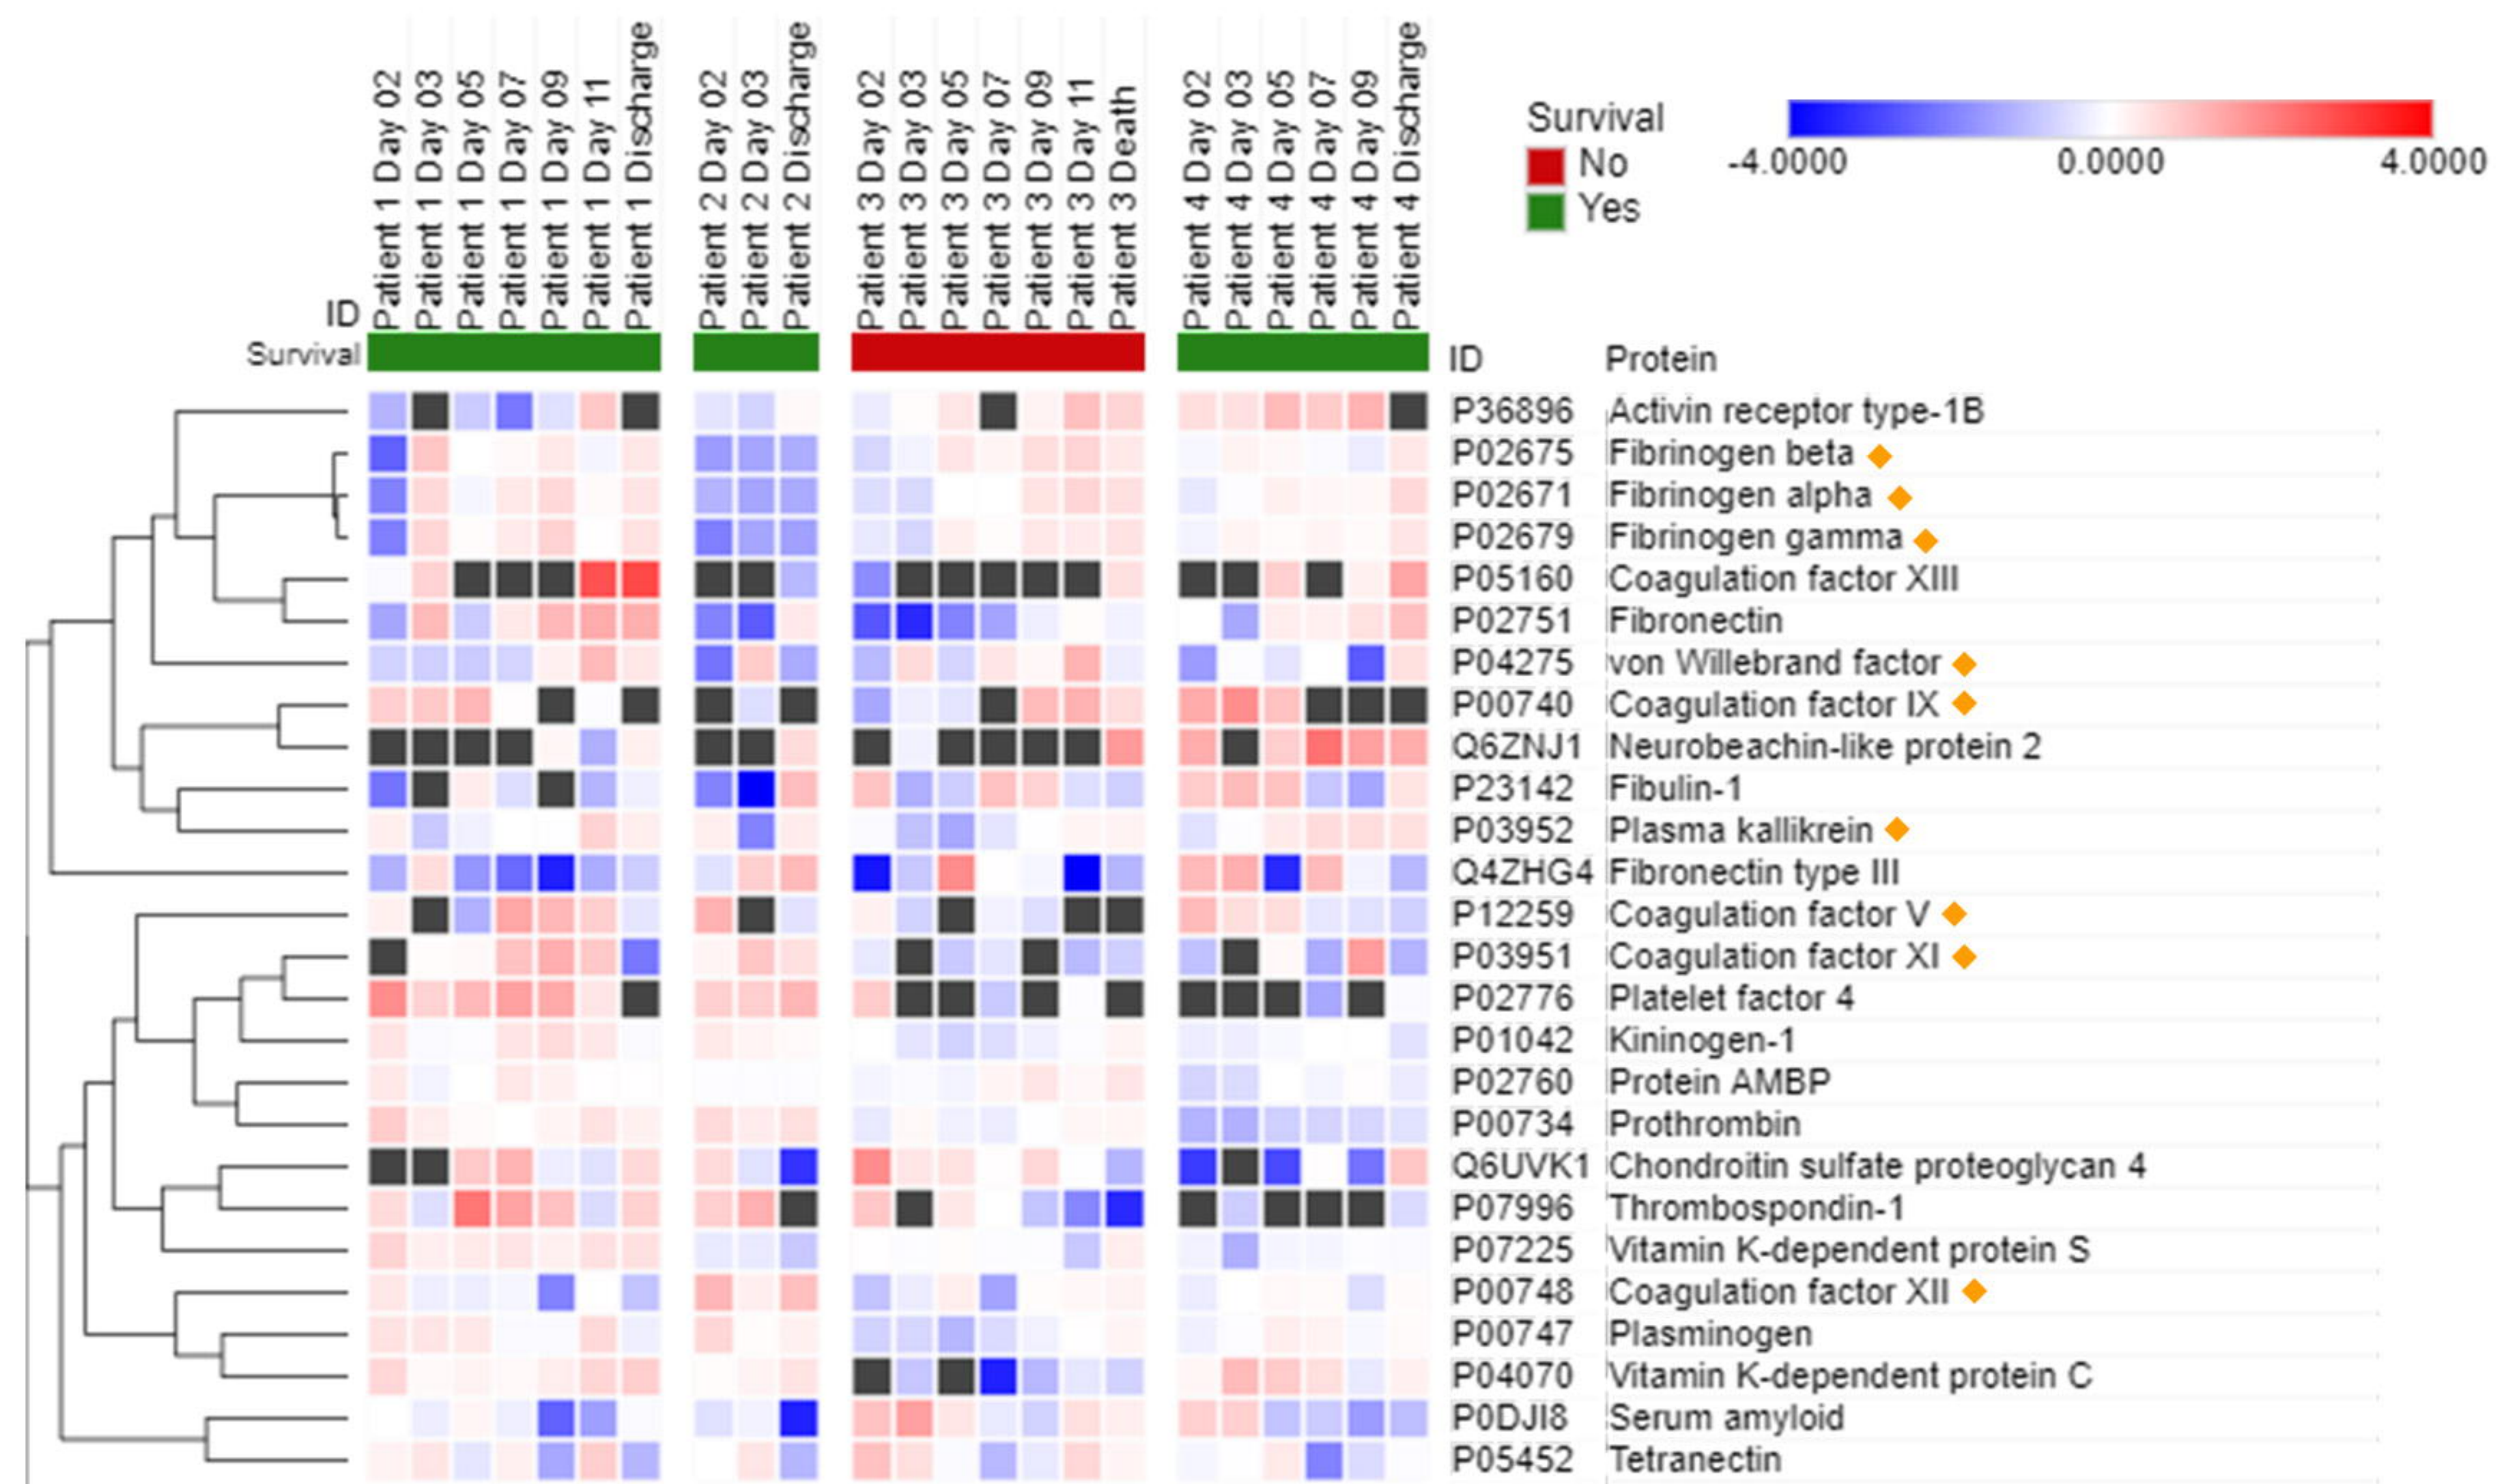**B**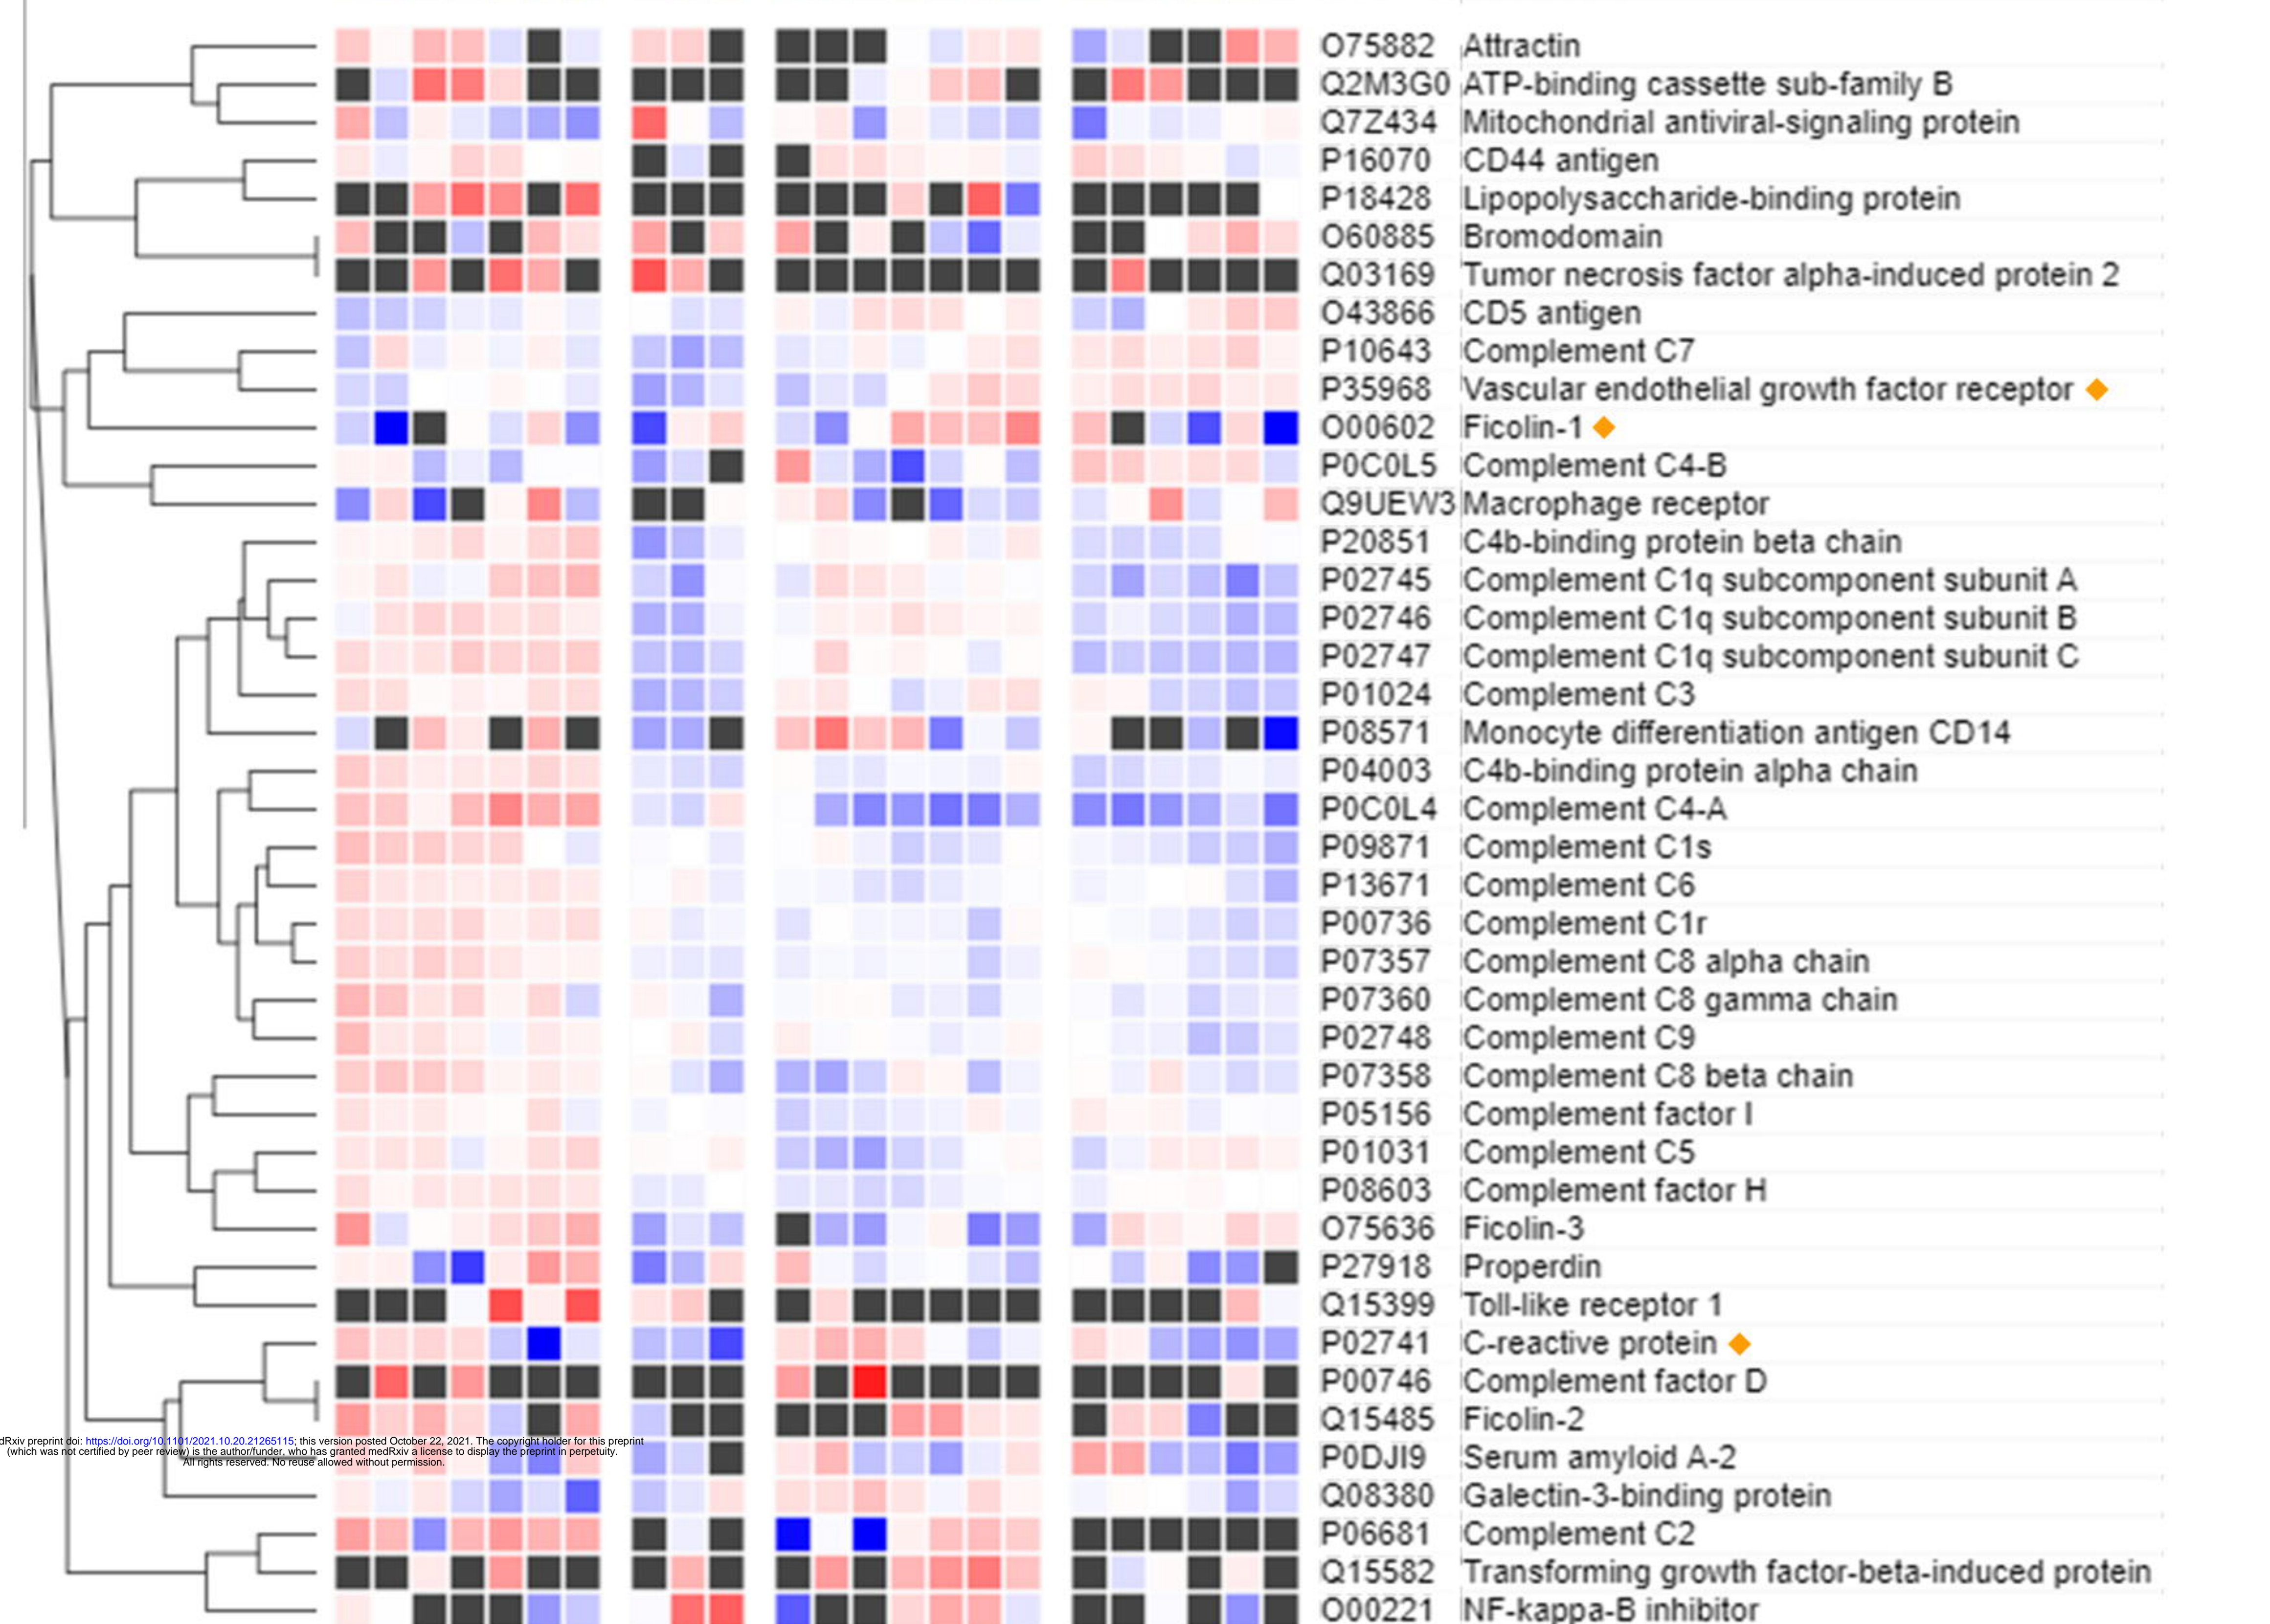**C**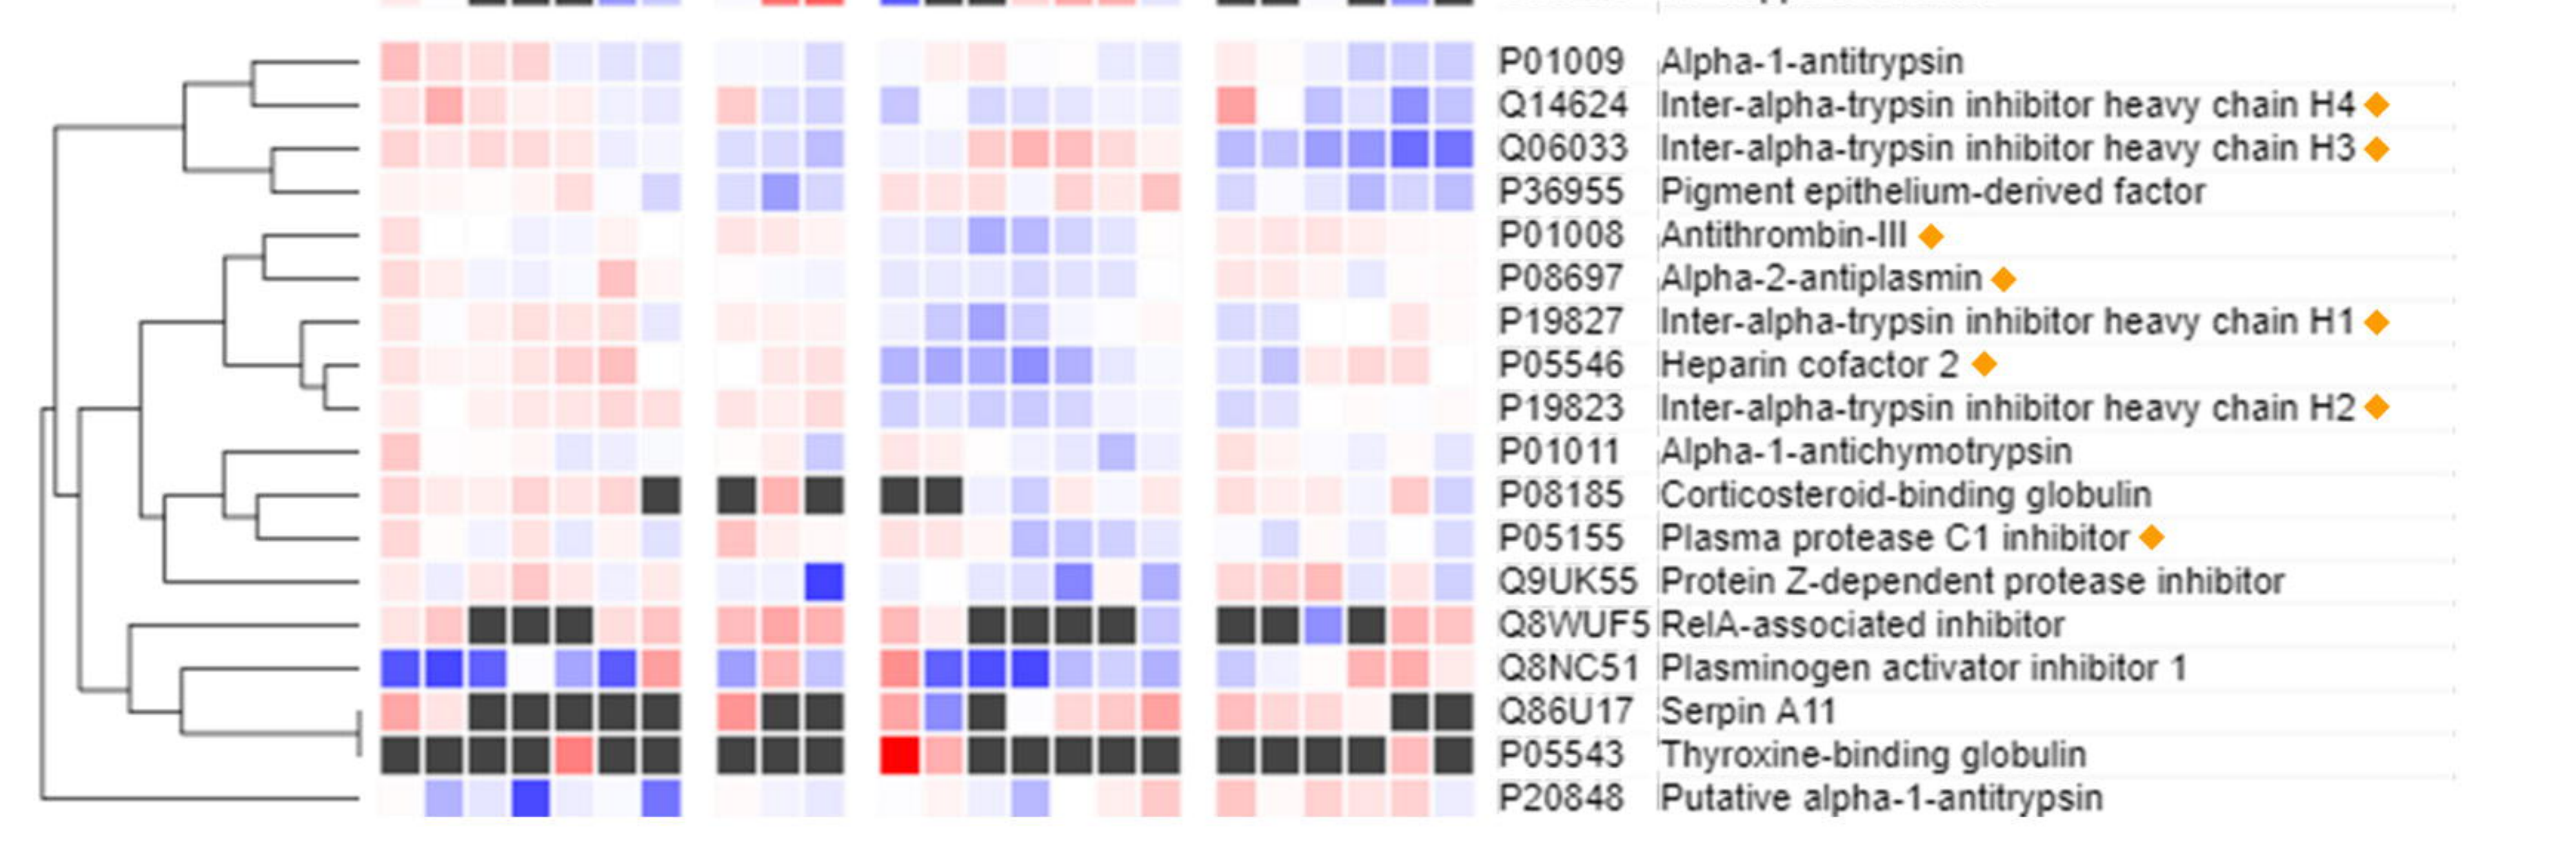

medRxiv preprint doi: <https://doi.org/10.1101/2021.10.20.21265110>; this version posted October 22, 2021. The copyright holder for this preprint (which was not certified by peer review) is the author/funder, who has granted medRxiv a license to display the preprint in perpetuity. All rights reserved. No reuse allowed without permission.



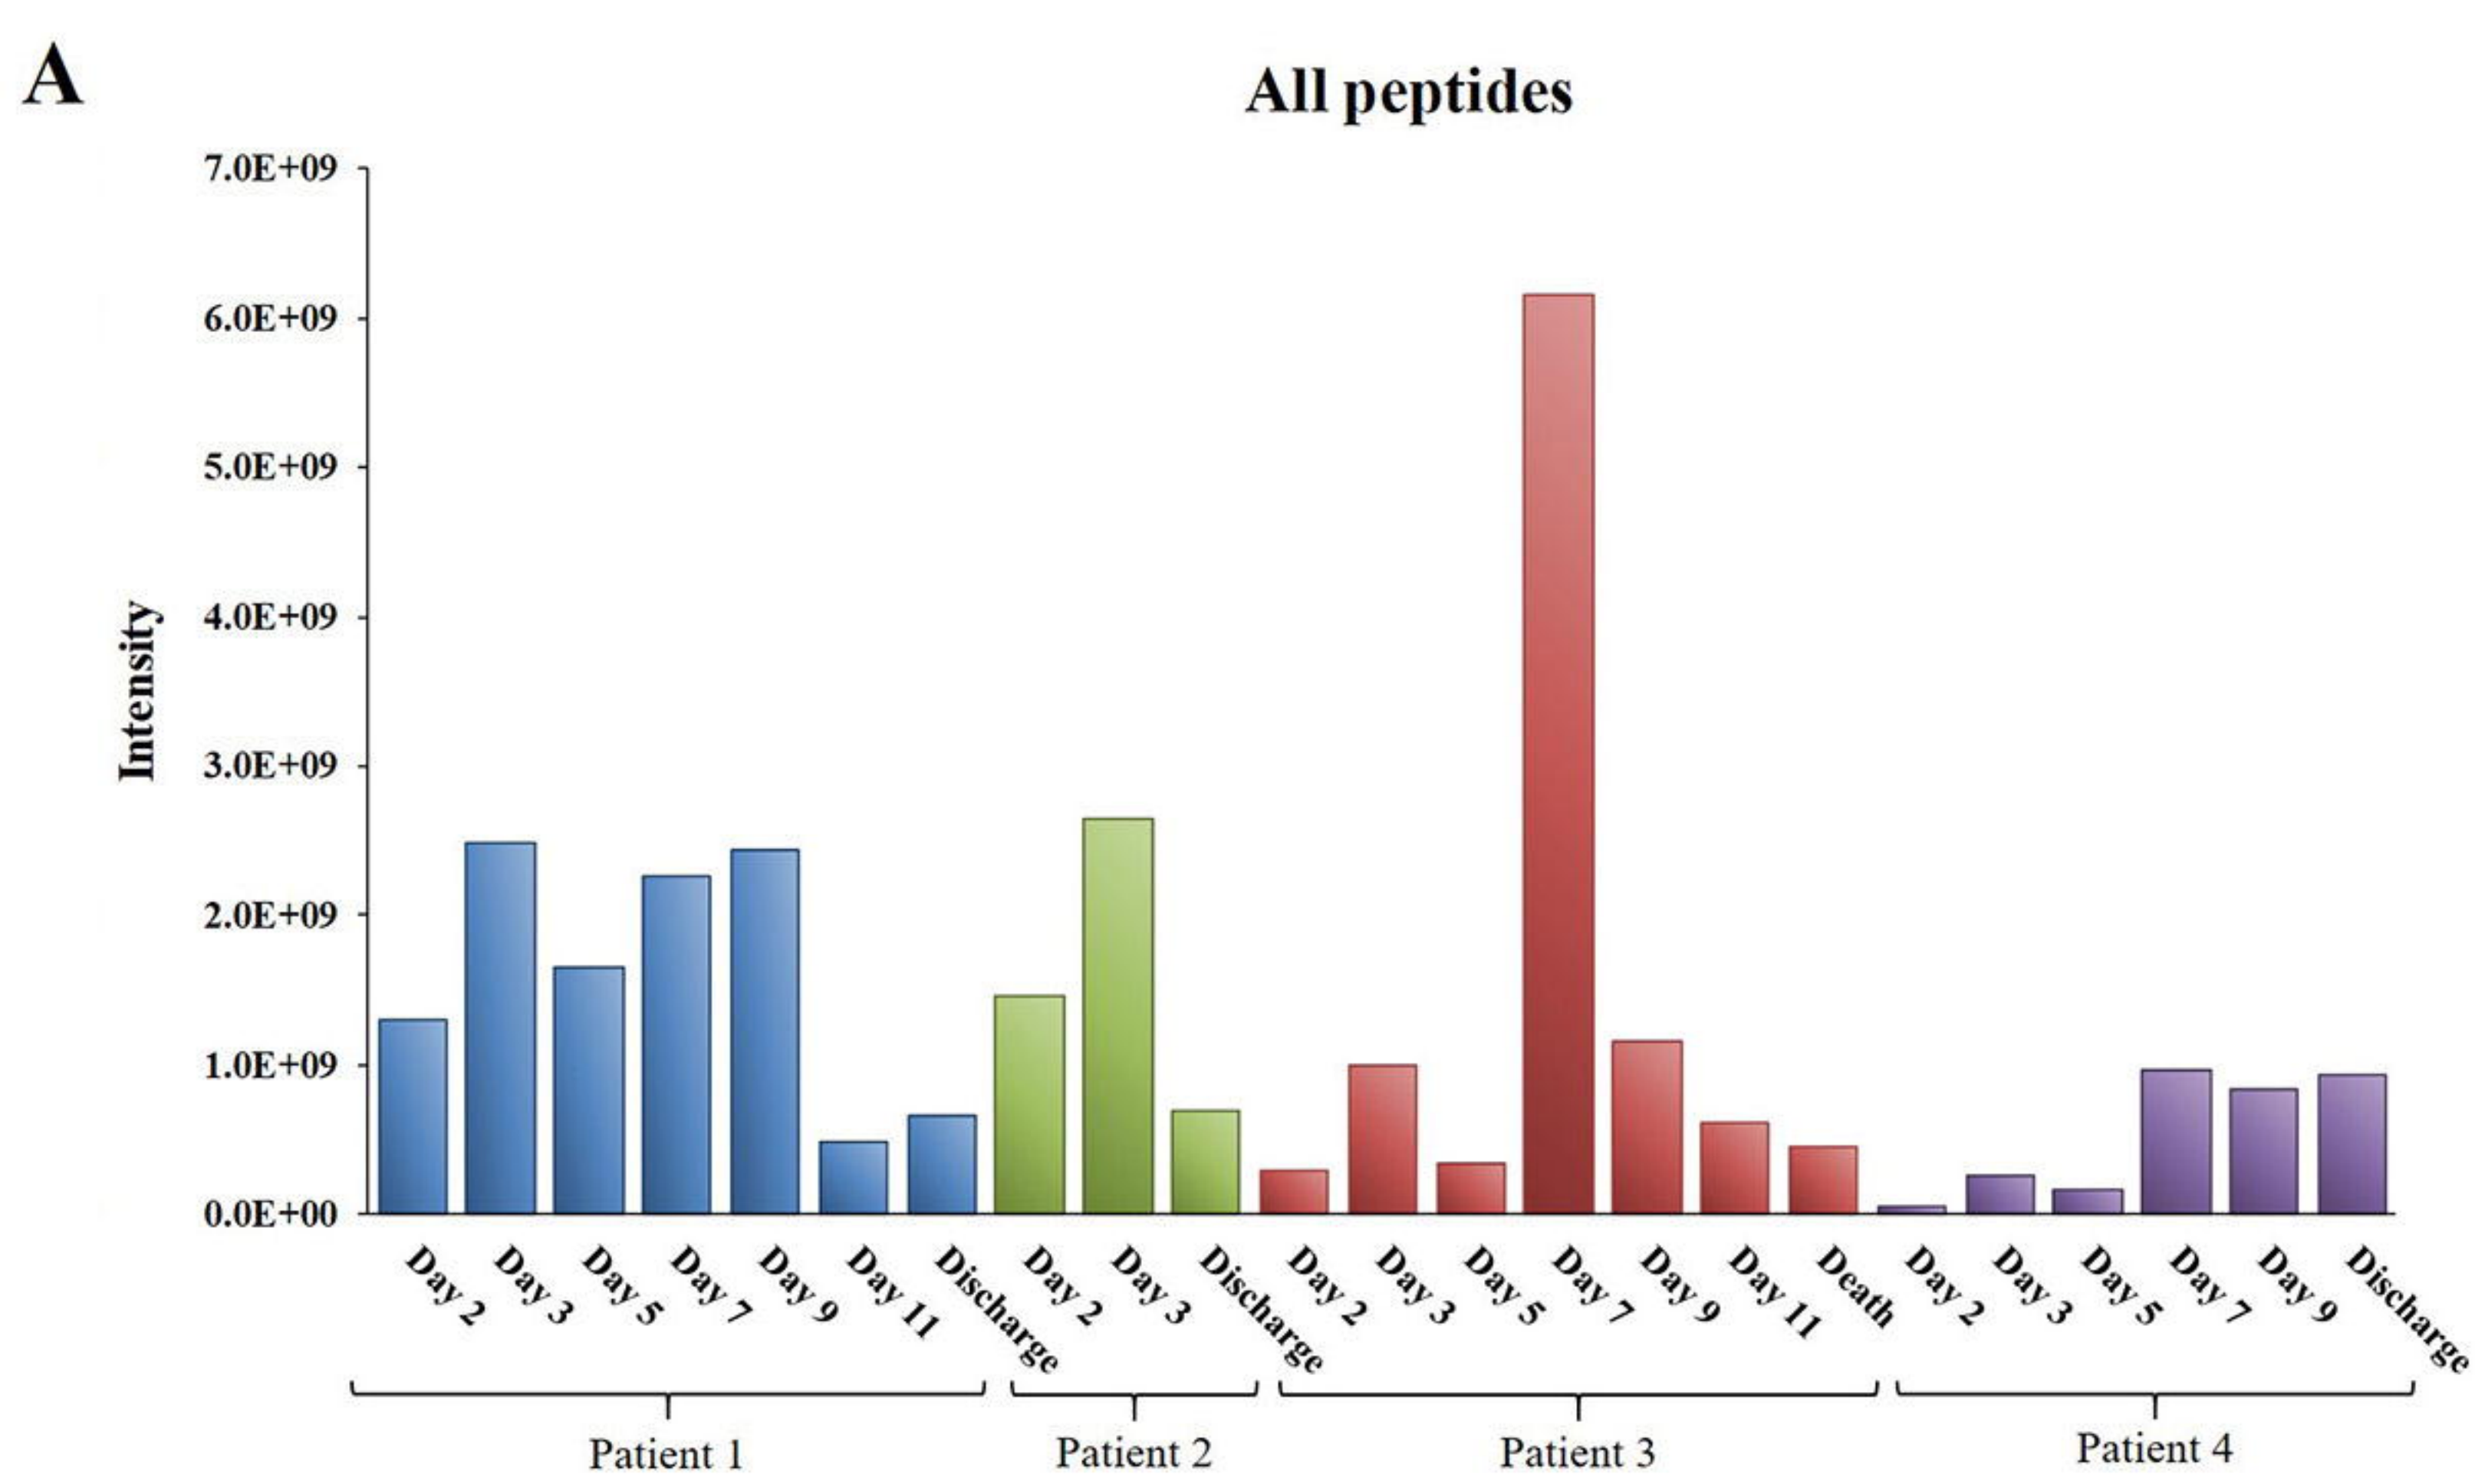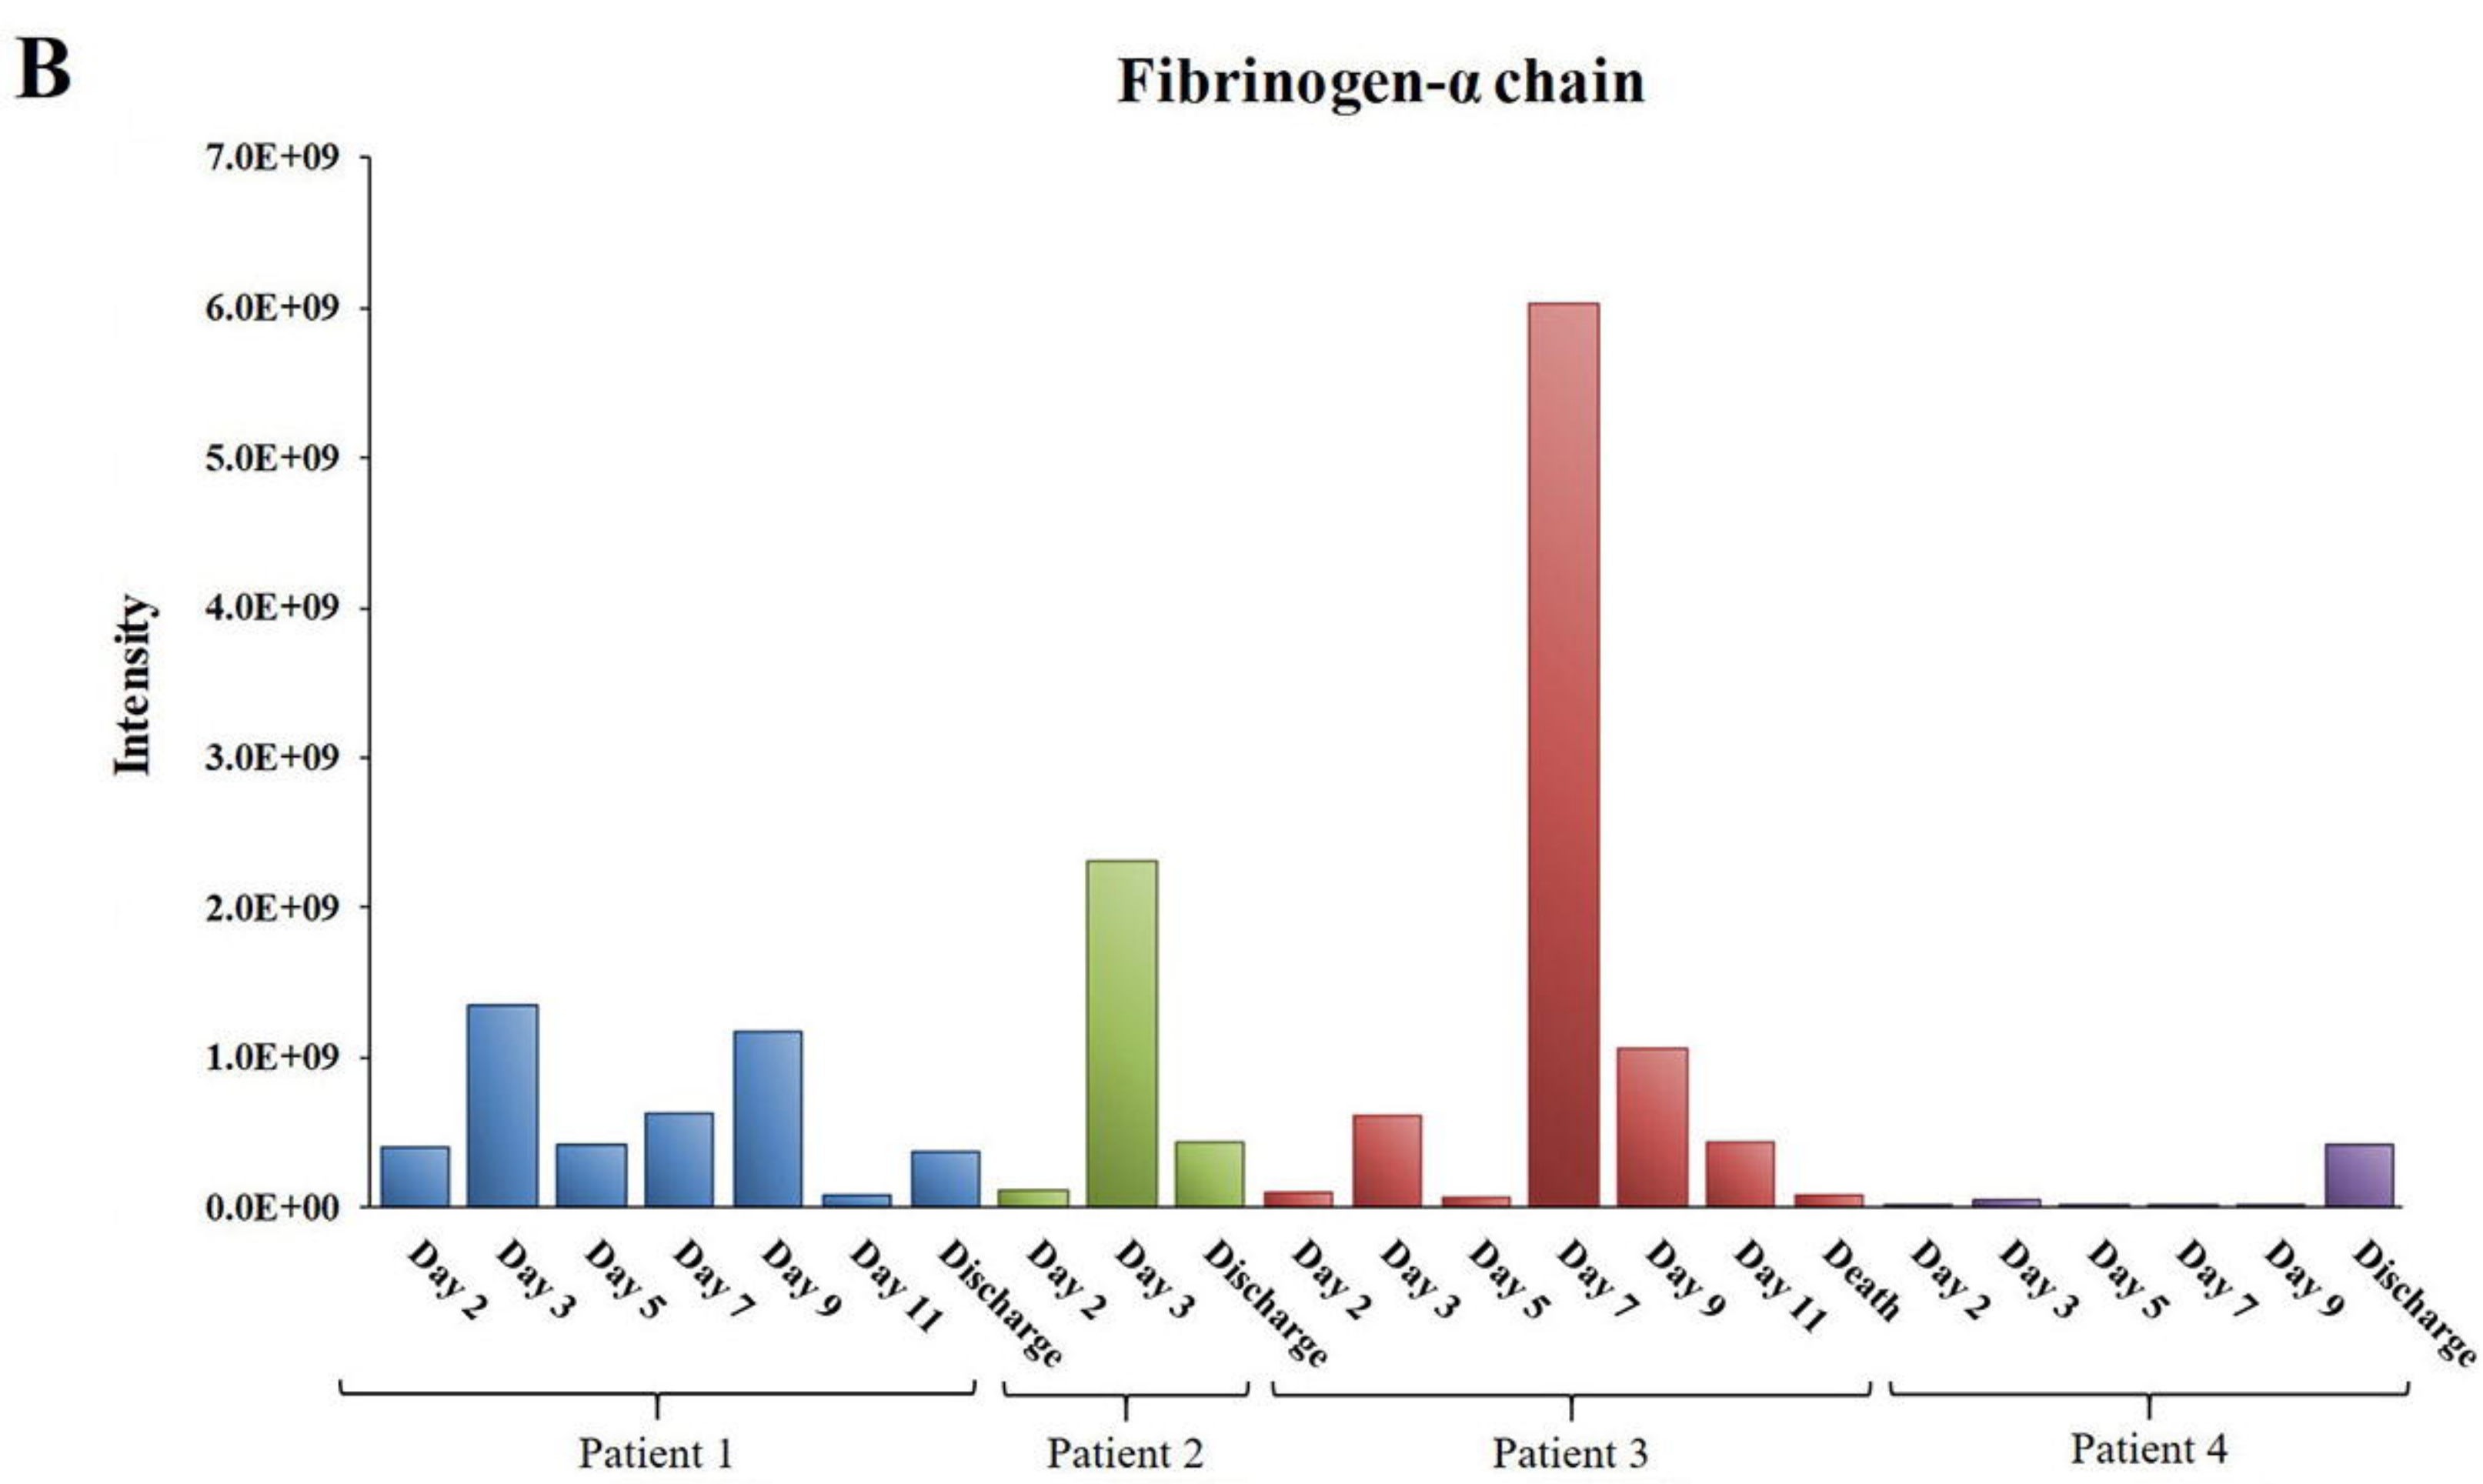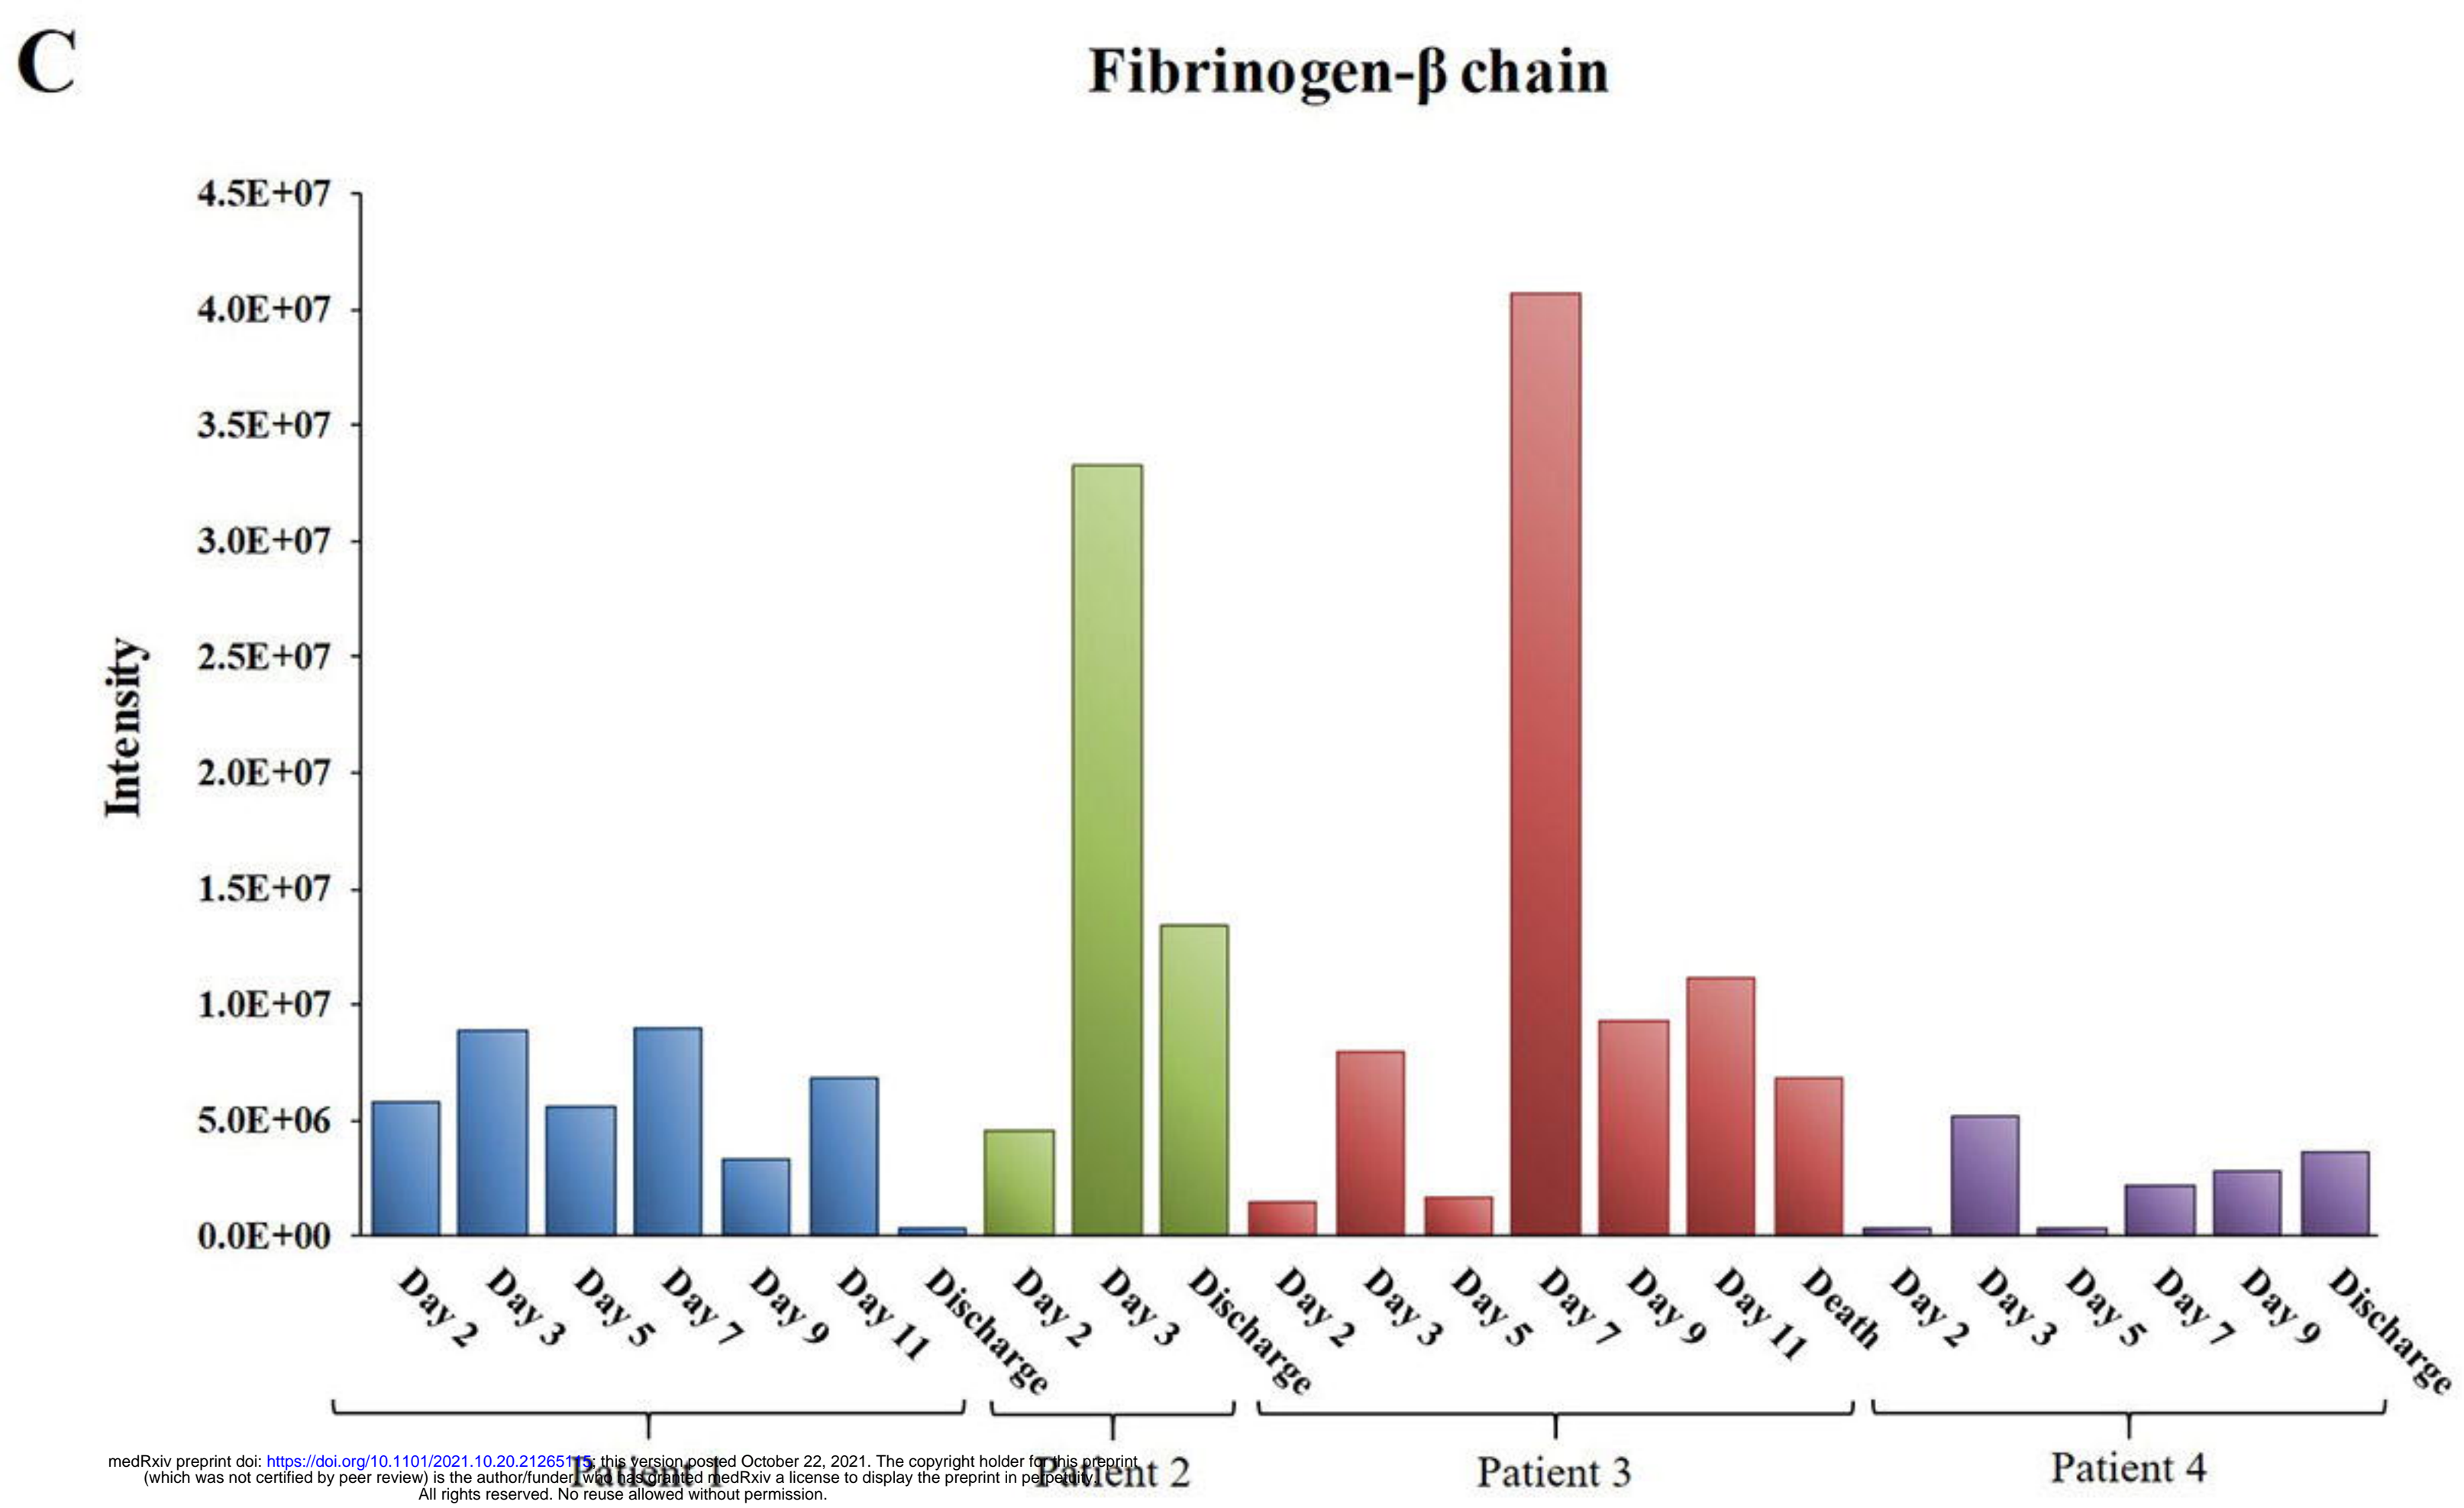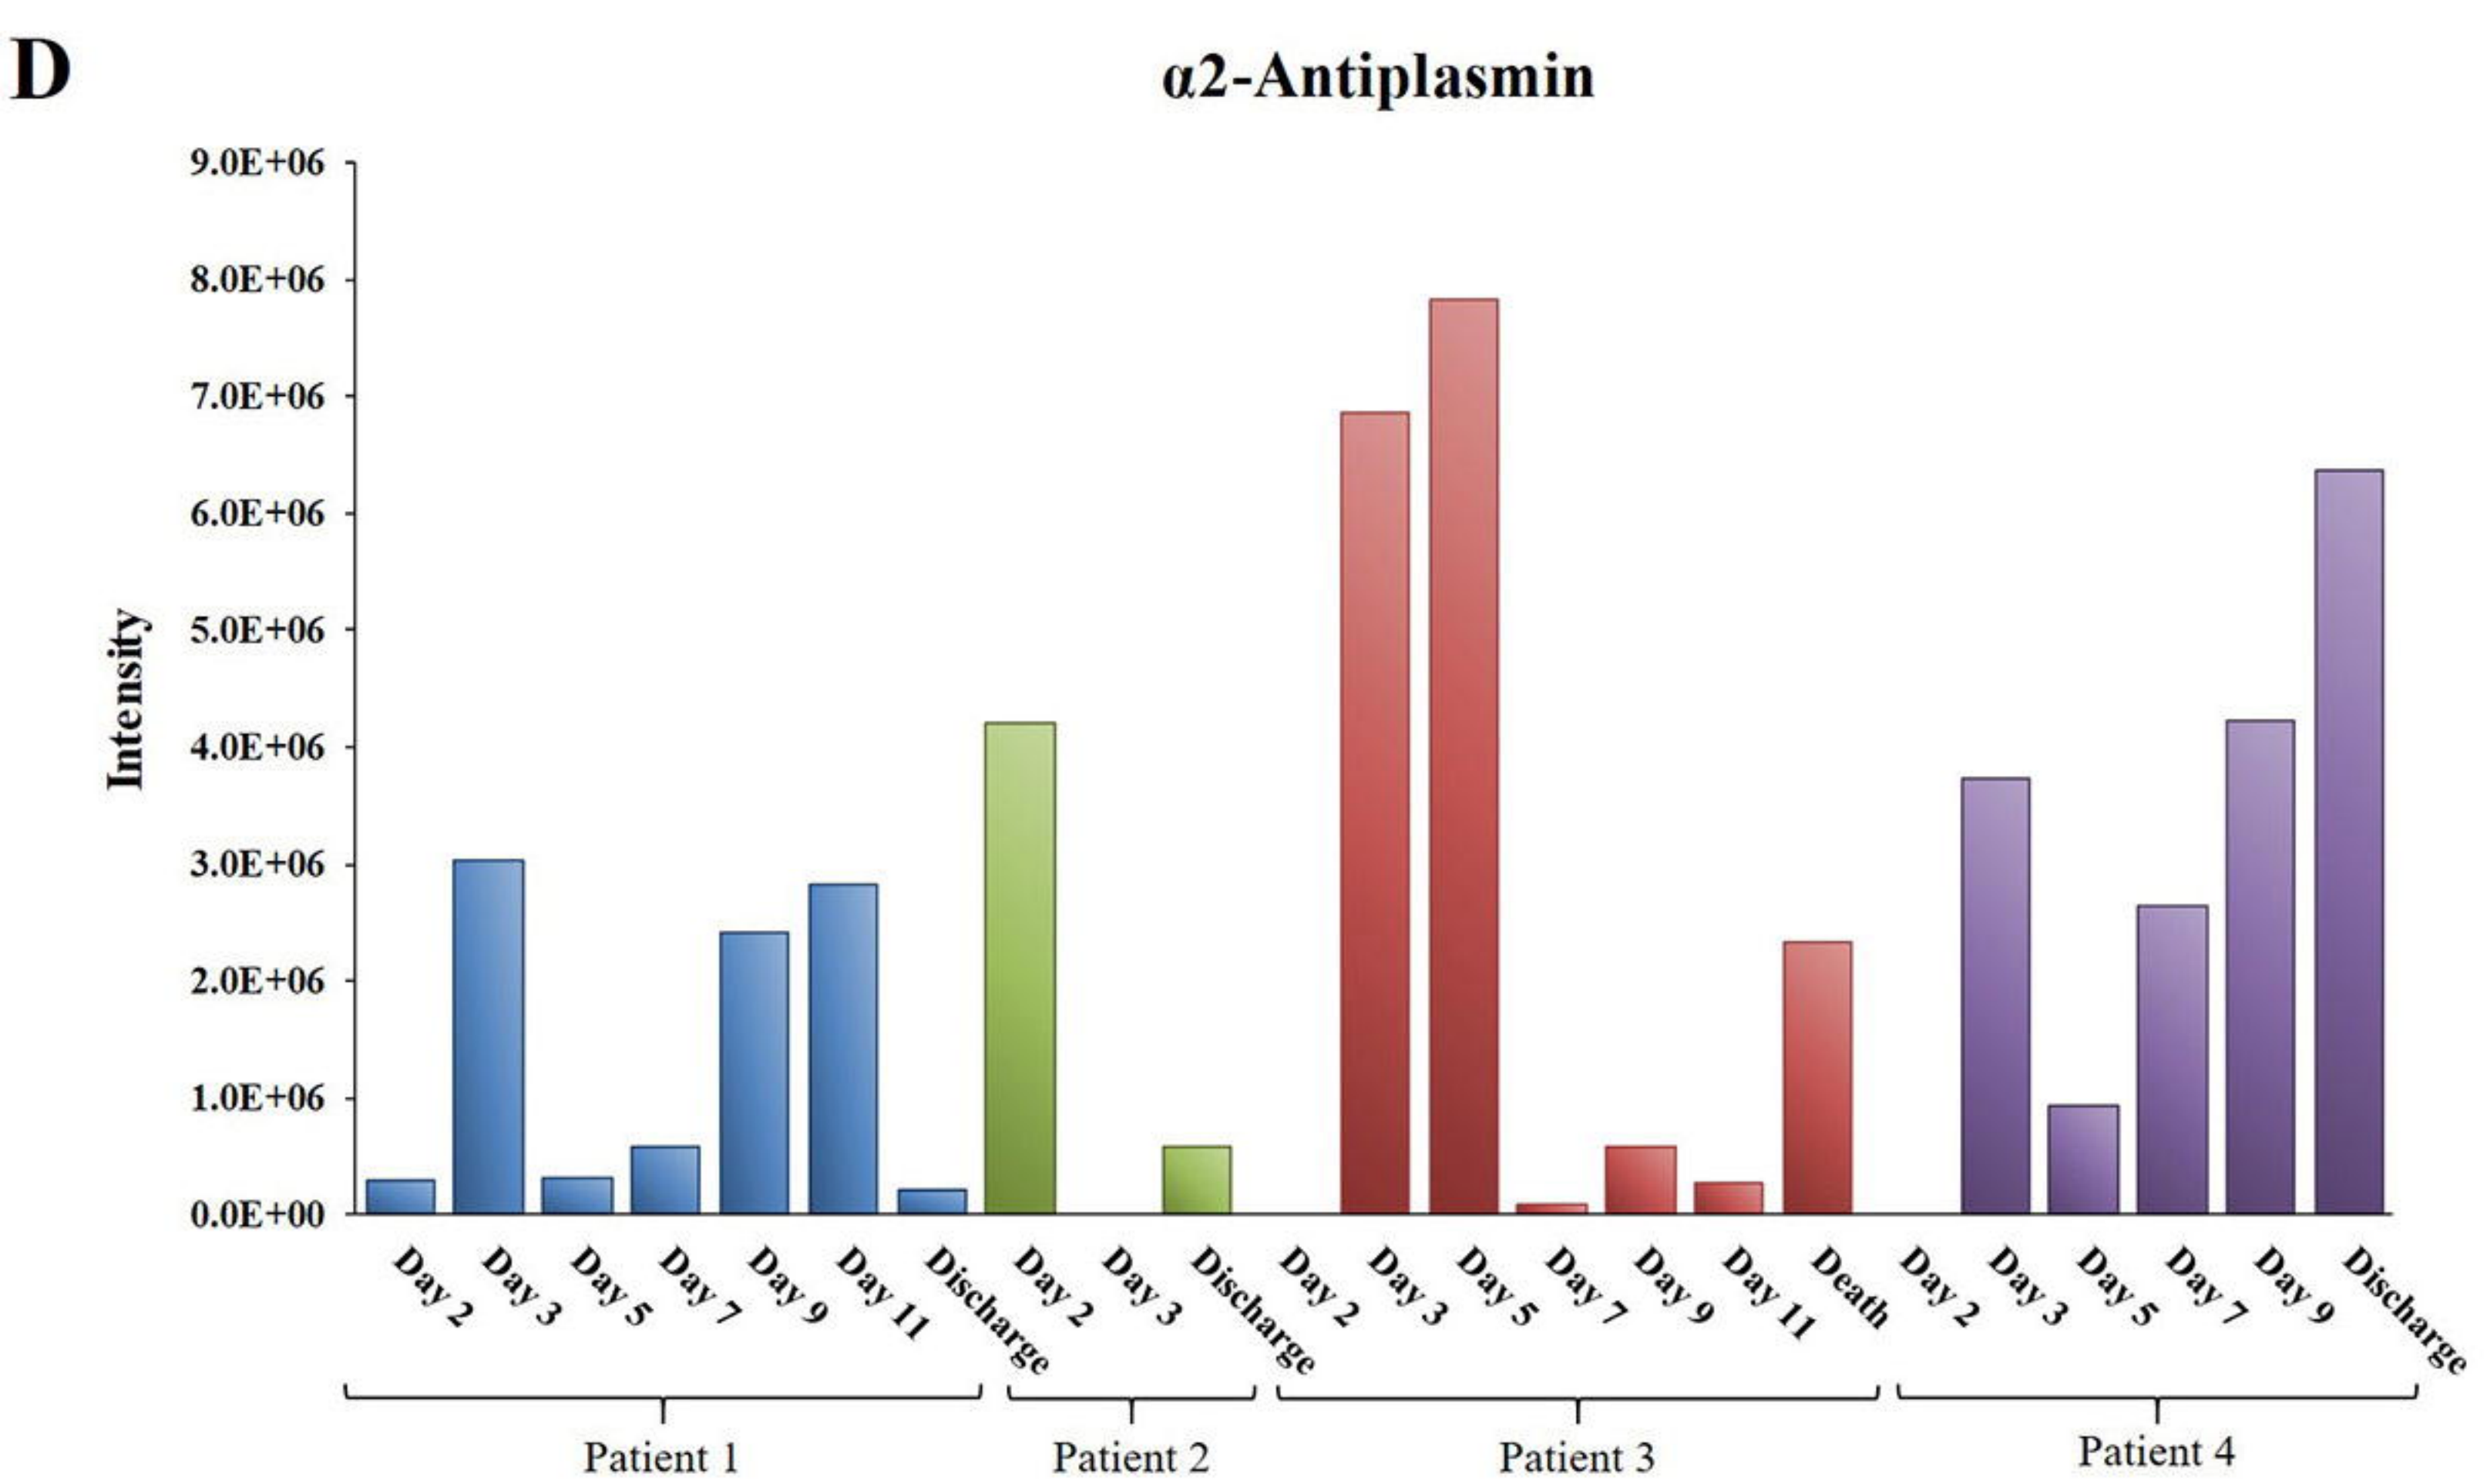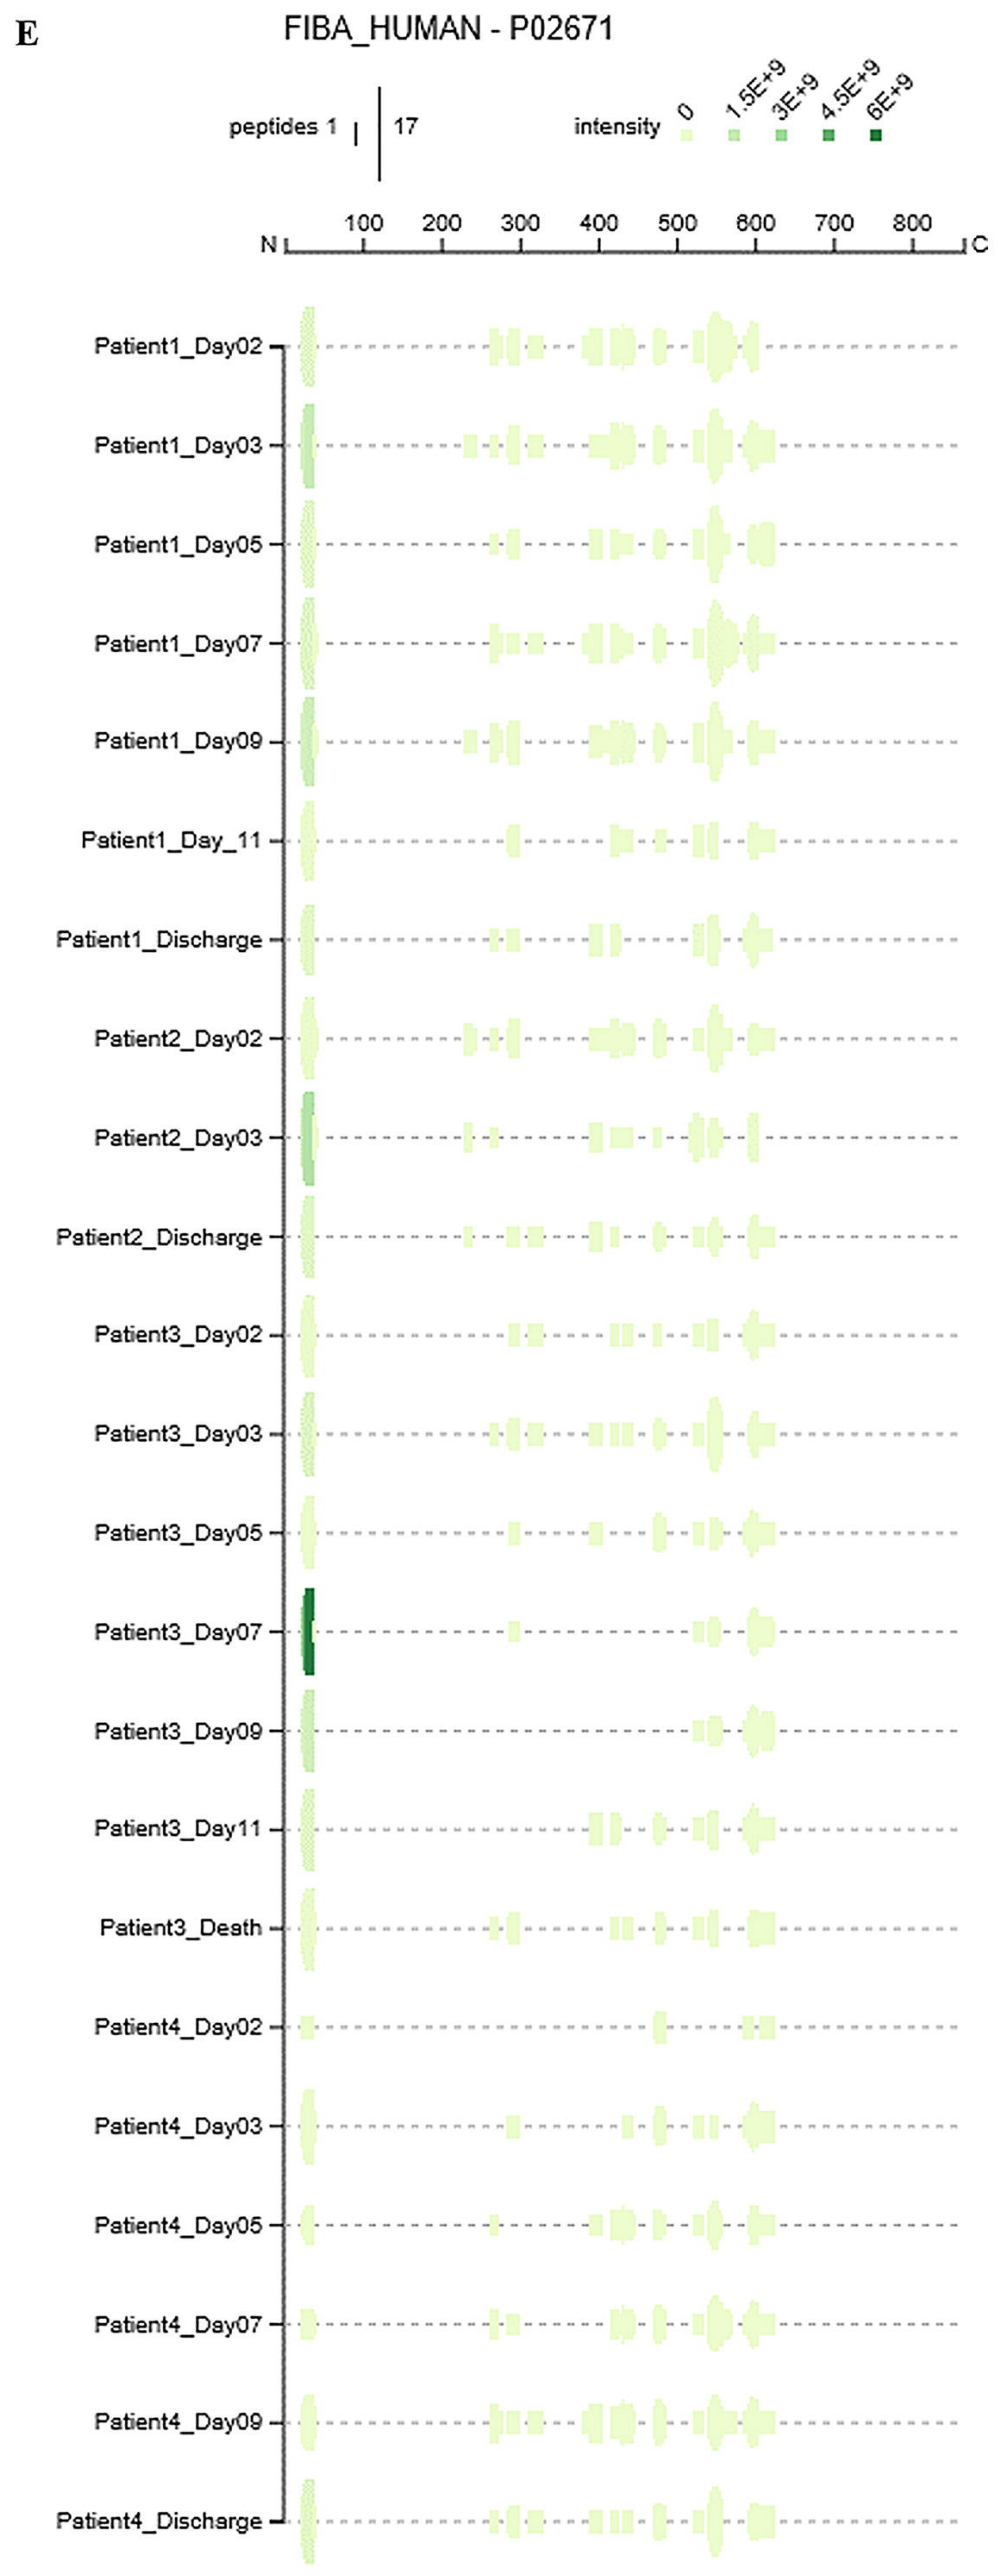

Source: https://medrxiv.org/content/10.1101/2021.10.20.21265115v1.full.pdf
